# Supplementary material for: Adherence to community versus facility-based delivery of monthly malaria chemoprevention with dihydroartemisinin-piperaquine for the post-discharge management of severe anemia in Malawian children: A cluster randomized trial
Source: PLoS One. 2021 Sep 10;16(9):e0255769. doi: 10.1371/journal.pone.0255769 (PMC8432777; doi:10.1371/journal.pone.0255769)
Supplement: S1 File — (XLS) [file pone.0255769.s002.xls]

## Sheet: HomeVisit_With_enrollment_Date_
subj_id	blistpac1	reason1	actdhta1	comment1	pmc11	blistpac2	reason2	actdhta2	comment2	pmc22	blistpac3	reason3	actdhta3	comment3	pmc33	PMC1Actual	PMC2Actua2	PMC3Actua3	totaldoses	enrollmentdate	outcomedate	outcome
1001	1		0		2016-04-10 23:58:57	1		0		2016-05-09 00:01:04	1		0	THE CHILD IS FINE, NO COMPLAITS RAISED	2016-06-06 00:01:00	3	3	3	9	2016-03-24	2016-06-30	Completed
1002	1		0		2016-04-10 23:58:57	1		0		2016-05-09 00:01:04	2	MOTHER NOT AT HOME		MOTHER WAS NOT AT HOME. BUT HER NEIGHBOURS SAID SHE WENT TO HER HOME VILLAGE BECAUSE SHE HAS BEEN DIVORCED.	2016-06-06 00:01:00	3	3	0	6	2016-03-24	2016-07-11	Withdraw Consent
1003	1		0		2016-04-21 23:59:00	1		0		2016-05-19 23:58:56	1		0		2016-06-17 00:01:03	3	3	3	9	2016-04-04	2016-07-11	Completed
1004	1		0		2016-04-25 00:00:01	1		0	CHILD HAD MALARIA ON 06/05/2016, WAS GIVEN LA, PCM AND VITAMIN A	2016-05-19 23:58:56	1		0	CHILD IS FINE AND NO COMPLAINTS RAISED. MOTHER HAS BEEN ADVISED TO COME TO THE STUDY CLINIC ON 11 JULY FOR AN END STUDY VISIT	2016-06-17 00:01:03	3	3	3	9	2016-04-04	2016-07-11	Completed
1005	1		0		2016-05-02 23:59:03	1		2	MOTHER DID NOT GIVE THE CHILD THE LAST DOSE. NO REASON WAS GIVEN	2016-05-28 00:00:10	1		0		2016-06-25 00:00:06	3	1	3	7	2016-04-13	2016-07-19	Completed
1006	1		0		2016-05-06 00:00:04	1		0	THE CHILD IS FINE, TOOK THE WITHOUT ANY PROBLEM. NO COMPLAITS RAISED.	2016-06-03	1		0		2016-07-01 23:59:32	3	3	3	9	2016-04-19	2016-07-26	Completed
1007	1		0		2016-05-11 23:59:53	1		0	CHILD IS FINE AND NO COMPLAINTS RAISED	2016-06-09 23:59:26	1		0		2016-07-07 23:59:22	3	3	3	9	2016-04-25	2016-08-08	Completed
1008	1		0		2016-05-28 00:00:10	1		0		2016-06-25 00:00:06	1		0	THE CHILD IS FINE, NO COMPLAINTS RAISED	2016-07-22 00:00:25	3	3	3	9	2016-05-10	2016-08-15	Completed
1009	1		0	THE IS FINE, TOOK THE DRUGS WITHOUT ANY PROBLEM.	2016-05-29 23:59:23	1		0	THE CHILD IS FINE, NO COMPLAITS RAISED	2016-06-26 23:59:19	1		0	CHILD IS FINE.	2016-07-24 23:59:14	3	3	3	9	2016-05-12	2016-08-18	Completed
1010	1		0	CHILD IS FINE, NO COMPLAITS RAISED.	2016-06-17 00:01:03											3	0	0	3	2016-05-26	2016-06-30	Death
1011	1		0		2016-07-07 23:59:22	1		0	THE CHILD IS FINE, NO COMPLAITS RAISED	2016-08-04 23:59:18	1		0	THE CHILD IS FINE, NO COMPLAITS RAISED. PILL PACK COLLECTED.	2016-08-31 23:59:37	3	3	3	9	2016-06-20	2016-09-26	Completed
1012	1		0	THE CHILD IS FINE, NO COMPLAINTS RAISED	2016-07-15 00:00:59	1		0	CHILD IS FINE, NO COMPLAINTS RAISED. PILL PACK COLLECTED.	2016-08-12 00:00:55	1		0	CHILD IS FINE NO COMPLAINTS RAISED. PILL PACK COLLECTED	2016-09-09 00:00:51	3	3	3	9	2016-06-28	2016-10-03	Completed
1013	1		0	THE CHILD IS FINE, NO COMPLAINTS RAISED.	2016-07-15 00:00:59	1		0	THE CHILD IS FINE, NO COMPLAINTS RAISED	2016-08-12 00:00:55	1		0	THE CHILD IS FINE, NO COMPLAINTS RAISED, PILL PACK COLLECTED.	2016-09-09 00:00:51	3	3	3	9	2016-06-28	2016-10-03	Completed
1014	1		0	Done	2016-07-30 23:59:04	1		0	CHILD IS FINE	2016-08-26 23:59:24	1		0	CHILD IS FINE	2016-09-26 00:00:44	3	3	3	9	2016-07-13	2016-10-19	Completed
1015	1		0	CHILD IS FINE . VOMITTED ONCE AFTER TAKING MEDICATION	2016-08-12 00:00:55	1		0	CHILD IS FINE, NO COMPLAINTS RAISED AND PILL PACK COLLECTED	2016-09-09 00:00:51	1		0	THE CHILD IS FINE, NO COMPLAINTS RAISED. PILL PACK COLLECTED	2016-10-07 00:00:47	3	3	3	9	2016-07-25	2016-10-31	Completed
1016	1		0	THE CHILD IS FINE, NO COMPLAINTS RAISED. PILL PACK COLLECTED	2016-10-20 23:59:39	1		0	HOME VISIT DONE, CHILD IS FINE, NO COMPLAINTS RAISED	2016-11-17 23:59:35	1		0	THE CHILD IS FINE, NO COMPLAINTS RAISED. PILL PACK COLLECTED.	2016-12-15 23:59:31	3	3	3	9	2016-10-03	2017-01-09	Completed
1017	1		0	CHILD ID FINE, NO COMPLAINTS RAISED	2016-11-11 00:00:09	1		0	CHILD IS FINE, NO COMPLAINTS RAISED. PILL PACK COLLECTED.	2016-12-09 00:00:05	1		0	THE CHILD IS FINE. NO COMPLAINTS RAISED	2017-01-06 00:00:01	3	3	3	9	2016-10-24	2017-01-29	Completed
1018	1		0	CHILD IS FINE, NO COMPLAINTS RAISED, PILL PACK COLLECTED.	2016-11-11 00:00:09	2	MOTHER NOT AT HOME		MOTHER WAS NOT AT HOME BECAUSE HAD GONE TO WORK IN THE MAIZE FIELD	2016-12-09 00:00:05	1		0	THE CHILD IS FINE, NO COMPLANTS RAISED,	2017-01-06 00:00:01	3	0	3	6	2016-10-24	2017-01-29	Completed
1019	1		0	THE CHILD IS FINE, NO COMPLAINTS RAISED AND THE BLISTER PACK HAS BEEN COLLECTED.	2016-11-15 00:00:46	1		0	CHILD IS FINE	2016-12-13 00:00:41	1		0	THE CHILD IS FINE AND PILL PACK COLLECTED.	2017-01-11 23:59:50	3	3	3	9	2016-10-28	2017-02-02	Completed
1020																				2016-11-02	2017-02-15	Withdraw Consent
1021	1		0	CHILD IS FINE, NO COMPLAINTS RAISED	2016-12-19 00:00:31	1		0	CHILD IS FINE AND BLISTER PACK COLLECTED	2017-01-16 00:00:27	1		0	THE CHILD IS FINE, NO COMPLAINTS RAISED. BLISTER PACK COLLECTED.	2017-02-15 23:59:12	3	3	3	9	2016-12-01	2017-03-08	Completed
1022	2	MOTHER WAS NOT AT HOME.		THE BLISTER PACK NIT COLLECTED BECAUSE MOTHER WAS NOT AT HOME.	2017-01-10 00:00:37	1		0	HOME VISIT DONE AND THE CHILD IS FINE. 2 BLISTER PACKS COLLECTED.	2017-02-06 00:00:57	1		0	CHILD IS FINE, NO COMPLAINTS RAISED	2017-03-07 00:00:29	0	3	3	6	2016-12-23	2017-03-30	Completed
1023	1		0	CHILD HAS DIARRHOEA AND VOMITTING FOR 3 DAYS. MOTHER HAS BEEN ADVISED TO GO TO THE HOSPITAL. PILL PACK COLLECTED.	2017-02-02 00:00:20	1		0	CHILD IS FINE	2017-03-02 00:00:16	2	MOTHER WAS NOT AT HOME		BLISTER NOT COLLECTED BECAUSE THE MOTHER WAS NOT AT HOME.	2017-03-30 23:59:48	3	3	0	6	2017-01-02	2017-04-23	Completed
1024	1		0	THE CHILD IS FINE, NO COMPLAINTS RAISED. BLISTER PACK COLLECTED.	2017-02-02 23:59:56	1		0	THE CHILD IS FINE. NO COMPLAINTS RAISED.	2017-03-02 00:00:16	1		0	CHILD IS FINE, BLISTER PACK COLLECTED.	2017-03-30 23:59:48	3	3	3	9	2017-01-16	2017-04-25	Completed
1025	1		0	CHIILD IS FINE, NO COMPLAINTS RAISED, BLISTER PACK COLLECTED.	2017-02-03 23:59:33	1		0	THE CHILD IS FINE, NO COMPLAINTS RAISED.	2017-03-03 23:59:29	1		0	HOME VISIT DONE, BLISTER PACK COLLECTED.	2017-03-31 23:59:25	3	3	3	9	2017-01-17	2017-04-25	Completed
1026	1		0	THE CHIKD IS FINE, NO COMPLAINTS RAISED. BLISTER PACK COLLECTED.	2017-02-08 00:00:10	1		0	THE CHILD IS FINE, NO COMPLAINTS RAISED	2017-03-06 00:00:53	1		0	CHILD IS FINE AND BLISTER PACK COLLECTED	2017-04-01 23:59:01	3	3	3	9	2017-01-18	2017-04-26	Completed
1027	1		0	THE CHILD IS FINE, DID NOT VOMIT THE DRUGS. PILL PACK COLLECTED	2017-02-08 00:00:10	1		0	CHILD IS FINE AND BLISTER PACK COLLECTED	2017-03-06 00:00:53	1		0	CHILD IS FINE. BLISTER PACK COLLECTED	2017-04-01 23:59:01	3	3	3	9	2017-01-18	2017-04-26	Completed
1028	2	MOTHER NOT AT HOME		THE BLISTER PACK WAS NOT COLLECTED BECAUSE THE MOTHER WAS NOT AT HOME.	2017-02-07 00:00:33	1		0	HOME VISIT DONE AND THE CHILD IS FINE. BLISTER PACK COLLECTED.	2017-03-08 00:00:06	1		0	THE CHILD IS FINE, NO COMPLAINTS RAISED. BLISTER PACK COLLECTED.	2017-04-04 00:00:25	0	3	3	6	2017-01-20	2017-04-27	Completed
1029	1		0	HOME VISIT DONE AND THE CHILD IS FINE. BLISTER PACK COLLECTED	2017-02-09 23:59:23	1		0	CHILD IS FINE, NO COMPLAINTS RAISED	2017-03-09 23:59:19	1		0	CHILD IS FINE, BLISTER PACK COLLECTED	2017-04-06 23:59:14	3	3	3	9	2017-01-23	2017-05-02	Completed
1030	2	THE EMPTY BLISTER PACK GOT LOST AFTER THE CHILD HAD TAKEN THE MEDICATION.		BLITER PACK NOT COLLECTED.	2017-02-17 00:01:00	1		0	THE CHILD IS FINE AND TWO BLISTER PACK COLLECTED BECAUSE CHILD WAS VOMITING AFTER EACH COURSE SO THE MOTHER WAS GIVING THE CHILD ANOTHER DOSE. .	2017-03-17 00:00:56	1		0	CHILD IS FINE	2017-09-13 00:00:11	0	3	3	6	2017-01-30	2017-05-15	Completed
1031	1		0	HONE VISUT DONE AND THE CHILD IS FINE. PILL PACK COLLECTED.	2017-02-21 23:59:02	1		0	HOME VISIT DONE AND THE CHILD IS FINE. BLISTER PACK COLLECTED.	2017-03-21 23:58:58	1		0	THE CHILD IS FINE. BLISTER PACK COLLECTED	2017-04-18 23:58:54	3	3	3	9	2017-02-04	2017-05-13	Completed
1032	1		0	THE CHILD IS FINE.	2017-02-24 00:00:26	2	MOTHER WAS NOT AT HOME, HAD GONE TO A FUNERAL IN NTAJA.		BLISTER PACK NOT COLLECTED, MOTHER HAD GONE TO A FUNERAL	2017-03-24 00:00:22	1		0	CHILD IS FINE. BLISTER PACK COLLECTED.	2017-04-21 00:00:18	3	0	3	6	2017-02-06	2017-05-15	Completed
1033	2	MOTHER WAS NOT AT HOME		CHILD IS FINE, NO COMPLAINTS RAISED. DID NOT COLLECT THE BLISTER PACK BECAUSE MOTHER WAS NOT AT HOME.	2017-02-24 00:00:26	1		0	FOLLOW-UP DONE. 2 BLISTER PACK COLLECTED	2017-03-24 00:00:22	1		0	CHILD IS FINE, BLISTER PACK COLLECTED	2017-04-21 00:00:18	0	3	3	6	2017-02-06	2017-05-15	Completed
1034	2	MOTHER DOESNT KNOW WHERE BLISTER PACK IS.		MOTHER DOESNT KNOW WHERE BLISTER PACK IS.	2017-03-04 23:59:05	1		0	CHILD IS FINE, BLISTER PACK COLLECTED	2017-04-04 00:00:25	1		0	CHILD IS FINE	2017-05-02 00:00:21	0	3	3	6	2017-02-15	2017-05-25	Completed
1035	1		0	CHILD IS FINE	2017-03-08 00:00:06	1		0	CHILD IS FINE, NO COMPLAINTS RAISED	2017-04-05 00:00:02	1		0	CHILD IS FINE, NO COMPLAINTS RAISED. BLISTER PACK COLLECTED.	2017-05-02 23:59:57	3	3	3	9	2017-02-18	2017-05-29	Completed
1036	1		0.5	THE CHILD IS FINE, NO COMPLAINTS RAISED, BLISTER PACK COLLECTED.	2017-03-13 00:00:19	2	MOTHER NOT AT HOME		MOTHER NOT AT HOME	2017-04-10 00:00:15	1		0	CHILD IS FINE	2017-05-08 00:00:11	2.5	0	3	5.5	2017-02-23	2017-05-31	Completed
1037	1		0	HOME VISIT DONE AND THE CHILD IS FINE.	2017-03-13 00:00:19	2	MOTHER NOT AT HOME		BLISTER PACK NOT COLLECTED	2017-04-10 23:59:51	1		0	CHILD IS FINE AND BLISTER PACK COLLECTED	2017-05-08 23:59:47	3	0	3	6	2017-02-24	2017-06-22	Completed
1038	1		0	CHILD IS FINE, NO COMPLAINTS RAISED. BLISTER PACK COLLECTED.	2017-03-26 23:59:11	1		0	HOME VISIT DONE,THE CHILD IS FINE AND BLISTER PACK IS COLLECTED	2017-04-26 00:00:31	1		0	CHILD IS FINE AND BLISTER PACK COLECTED.	2017-05-21 23:59:03	3	3	3	9	2017-03-09	2017-01-20	Withdraw Consent
1039	1		0	CHILD IS FINE, BLISTER PACK COLLECTED	2017-04-01 23:59:01	1		0	CHILD IS FINE AND BLISTER PACK COLLECTED	2017-05-02 00:00:21	1		0	THE CHILD IS FINE	2017-05-29 00:00:40	3	3	3	9	2017-03-15	2017-06-22	Completed
1040	1		0	CHILD IS FINE, NO COMPLAINTS RAISED.	2017-04-01 23:59:01											3	0	0	3	2017-03-15	2017-05-08	Death
1041	2	MOTHER WAS NOT AT HOME		HOME VISIT NOT DONE.	2017-04-03 00:00:49	1		0	HOME VISIT DONE ,THE CHILD IS FINE AND BLISTER PACK IS COLLECTED	2017-05-02 00:00:21	2	MOTHER MISPLACED BLISTER PACK		CHILD FINE MOTHER MISPLACED BLISTER PACK	2017-05-29 00:00:40	0	3	0	3	2017-03-15	2017-06-21	Completed
1042	1		0	CHILD IS FINE AND BLISTER PACK COLLECTED	2017-04-05 23:59:38	1		0	HOME VISIT DONE,THE CHILD IS FINE AND BLISTER PACK COLLECTED	2017-05-03 23:59:34	2	MISSPLACE IT		THE CHILD IS FINE	2017-06-01 23:59:06	3	3	0	6	2017-03-19	2017-07-01	Completed
1043	2	MOTHER NOT AT HOME		BLISTER PACK NOT COLLECTED BECAUSE MOTHER WAS NOT AT HOME	2017-04-08 00:01:02	1		0	HOME VISIT DONE,THE CHILD IS FINE AND BLISTER PACK COLLECTED	2017-05-04 23:59:10	1		0	CHILD IS FINE, BLISTER PACK COLLECTED	2017-06-01 23:59:06	0	3	3	6	2017-03-21	2017-06-27	Completed
1044	1		0	CHILD IS FINE	2017-04-18 23:58:54	1		0	CHILD IS FINE AND BLISTER PACK COLLECTED	2017-05-15 23:59:13	1		0	CHOLD IS FINE	2017-06-12 23:59:09	3	3	3	9	2017-03-31	2017-07-07	Completed
1045	1		0	HOME VISIT DONE,THE CHILD IS FINE AND THE BLISTER PACK IS COLLECTED	2017-04-26 00:00:31	1		0	CHILD IS FINE AND CHILD IS FINE	2017-05-24 00:00:27	1		0	CHILD IS FINE, BLISTER PACK COLLECTED	2017-06-21 00:00:23	3	3	3	9	2017-04-08	2017-07-14	Completed
1046	1		0	HOME VISIT DONE,THE CHILD IS FINE AND BLISTER PACK COLLECTED	2017-05-02 00:00:21	1		0	CHILD IS FINE AND BLISTER PACK COLLECTED	2017-05-29 00:00:40	1		0	CHILD IS FINE AND BLISTER PACK COLLECTED	2017-06-27 00:00:13	3	3	3	9	2017-04-12	2017-07-19	Completed
1047	1		0	CHILD IS FINE AND BLISTER PACK COLLECTED	2017-05-15 23:59:13	1		0	CHILD IS FINE AND BLISTER PACK COLLECTED	2017-06-11 23:59:33	1		0	HOME VISIT DONE THE CHILD IS FINE AND BLISTER PACK IS COLLECTED	2017-07-09 23:59:29	3	3	3	9	2017-04-27	2017-08-03	Completed
1048	2	MOTHER WAS NOT AT HOME		MOTHER WAS NOT AT HOME HENCE NO BLISTER PACK COLLECTED	2017-05-15 23:59:13	1		0	CHILD IS FINE AND BLISTER PACK COLLECTED	2017-06-11 23:59:33	1		0	CHILD IS FINE, BLISTER PACK COLLECTED	2017-07-09 23:59:29	0	3	3	6	2017-04-27	2017-08-03	Completed
1049	1		0	HOME VISIT DONE AND CHILD IS FINE. BLISTER PACK COLECTED	2017-05-17 00:01:01	1		0	CHILD IS FINE	2017-06-14 00:00:57	1		0	CHILD IS FINE, BLISTER PACK COLLECTED	2017-07-12 00:00:53	3	3	3	9	2017-04-29	2017-08-07	Completed
1050	2	MOTHER WAS NOT AT HOME		MOTHER WAS NOT AT HOME		1		0	CHILD IS FINE, BLISTER PACK COLLECTED		2	MOTHER NOT AT HOME		MOTHER NOT AT HOME		0	3	0	3	2017-05-29	2017-09-05	Withdraw Consent
1051	2	MOTHER WAS NOT AT HOME		MOTHER WAS NOT AT HOME SHE IS IN MANGOCHI	2017-06-16 23:59:46	2	BLISTER PACK NOT COLLECTED		MOTHER NOT AT HOME SHE IS IN MANGOCHI	2017-07-14 00:00:06	1		0	BLISTER PACK COLLECTED	2017-08-11 00:00:02	0	0	3	3	2017-05-30	2017-09-11	Withdraw Consent
1052	1		0	CHILD IS FINE AND BLISTER PACK COLLECTED	2017-06-29 23:59:02	1		0	CHILD IS FINE AND BLISTER PACK COLLECTED	2017-07-27 23:58:58	1		0	CHILD IS FINE	2017-08-23 23:59:18	3	3	3	9	2017-06-12	2017-09-18	Completed
1053	1		0	HOME VISIT DONE,THE CHILD IS FINE AND BLISTER PACK IS COLLECTED	2017-06-28 23:59:26	1		0	HOME VISIT IS DONE,THE CHILD IS FINE AND BLISTER PACK COLLECTED	2017-07-30 00:00:22	1		0	CHILD IS FINE	2017-08-23 23:59:18	3	3	3	9	2017-06-12	2017-09-18	Completed
1054	1		0	CHILD IS FINE	2017-07-10 23:59:05	1		0	CHILD IS FINE.	2017-08-06 23:59:25	1		0	CHILD IS FINE, BLISTER PACK COLLECTED	2017-09-04 23:58:57	3	3	3	9	2017-06-23	2017-09-29	Completed
1055	1		0	BLISTER PACK COLLECTED	2017-07-20 23:59:32	1		0	CHILD IS FINE	2017-08-16 23:59:51	1		0	CHILD IS FINE AND BLISTER PACK COLLECTED	2017-09-14 23:59:24	3	3	3	9	2017-07-03	2017-10-09	Completed
1056	2	MOTHER WAS NOT AT HOME		BLISTER PACK NOT COLLECTED BECAUSE MOTHER WAS NOT AT HOME.	2017-08-04 00:00:35	1		0	CHILD IS FINE AND 2 BLISTER PACKS COLLECTED	2017-09-01 00:00:31	1		0	CHILD IS FINE AND BLISTER PACK COLLECTED	2017-09-29 00:00:27	0	3	3	6	2017-07-17	2017-10-23	Completed
1057	1		0	CHILD IS FINE	2017-08-21 00:00:28	1		0	CHILD IS FINE AND BLISTER PACK COLLECTED	2017-09-18 00:00:24	1		0	CHILD IS FINE AND BLISTER PACK COLLECTED	2017-10-16 23:59:56	3	3	3	9	2017-08-03	2017-11-08	Completed
1058	1		3	CHILD IS FINE AND BLISTER PACK COLLECTED	2017-11-02 23:59:49	1		3	BLISTER PACK COLLECTED AND CHILD IS FINE	2017-12-01 23:59:22	2	COMREC HAS NOT YET APPROVED THE PMC STUDY RENEWAL.		BLISTER PACK NOT COLLECTED	2018-01-02 00:00:18	0	0	0	0	2017-10-17	2018-01-23	Completed
1059	1		0		2018-04-05 00:00:56	1		0	BLISTER PACK COLLECTED AND CHILD IS FINE	2018-05-04 00:00:28	1		0	CHILD IS FINE AND BLISTER PACK COLLECTED	2018-06-01 00:00:24	3	3	3	9	2018-03-19	2018-06-24	Completed
1060	1		0	CHILD IS FINE AND BLISTER PACK COLLECTED	2018-04-29 23:59:51	1		0	BLISTER PACK COLLECTED AND CHILD IS FINE	2018-05-27 23:59:47	1		0	BLISTER PACK COLLECTED AND CHILD IS FINE	2018-06-24 23:59:43	3	3	3	9	2018-04-12	2018-07-18	Completed
1061	1		0	BLISTER PACK COLLECTED AND CHILD IS FINE	2018-05-08 00:01:05	1		0	CHILD IS FINE AND BLISTER PACK COLLECTED	2018-06-14 23:59:16	1		0	BLISTER PACK COLLECTED AND CHILD IS FINE	2018-07-01 23:59:09	3	3	3	9	2018-04-13	2018-07-27	Completed
1062	1		0	CHILD IS FINE	2018-05-17 23:59:21	1		0	CHILD IS FINE AND BLISTER PACK COLLECTED	2018-06-16 00:01:04	1		0	CHILD IS FINE AND BLISTER PACK COLLECTED	2018-07-12 23:59:12	3	3	3	9	2018-05-01	2018-08-07	Completed
1063	1		0	CHILD IS FINE	2018-05-17 23:59:21	1		0	CHILD IS FINE AND BLISTER PACK COLLECTED	2018-06-16 00:01:04	1		0	CHILD IS FINE AND BLISTER PACK COLLECTED	2018-07-12 23:59:12	3	3	3	9	2018-05-01	2018-08-07	Completed
1064	2	MOTHER WAS NOT AT HOME		BLISTER PACK NOT COLLECTED	2018-05-21 23:59:57	1		0	BLISTER PACK COLLECTED AND CHILD IS FINE	2018-07-01 23:59:09	2	MOTHER WAS NOT AT HOME, BLISTER PACK NOT COLLECTED		BLISTER PACK NOT COLLECTED BECAUSE MOTHER WAS NOT AT HOME	2018-07-29 23:59:05	0	3	0	3	2018-05-04	2018-08-23	Completed
1065	1		0	BLISTER PACK COLLECTED AND CHILD IS FINE	2018-05-22 23:59:34	1		0	BLISTER PACK COLLECTED AND CHILD IS FINE	2018-06-19 23:59:30	1		0	CHILD IS FINE AND BLISTER PACK COLLECTED	2018-07-17 23:59:26	3	3	3	9	2018-05-05	2018-08-09	Completed
1066	1		0	BLISTER PACK COLLECTED AND CHILD IS FINE	2018-06-18 00:00:17	1		0	CHILD IS FINE AND BLISTER PACK COLLECTED	2018-07-16 00:00:13	1		0	BLISTER PACK COLLECTED AND CHILD IS FINE	2018-08-13 00:00:09	3	3	3	9	2018-05-31	2018-09-16	Completed
1067	2	MOTHER WAS NOT HOME		BLISTER PACK NOT COLLECTED BECAUSE MOTHER WAS NOT AT HOME	2018-06-19 23:59:30	1		0	CHILD IS FINE AND BLISTER PACK COLLECTED	2018-07-17 23:59:26	1		0	CHILD IS FINE	2018-08-14 23:59:22	0	3	3	6	2018-06-02	2018-09-06	Completed
1068	2	MOTHER WAS NOT AT HOME		BLISTER PACK NOT COLLECTED BECAUSE MOTHER WAS NOT AT HOME	2018-06-25 23:59:20	2	MOTHER WAS NOT AT HOME		BLISTER PACK COLLECTED BECAUSE MOTHER WAS NOT AT HOME	2018-07-23 23:59:15	1		0	CHILD IS FINE AND BLISTER PACK COLLECTED	2018-08-20 23:59:11	0	0	3	3	2018-06-08	2018-09-14	Completed
1069	1		0	BLISTER PACK COLLECTED AND CHILD IS FINE	2018-06-25 23:59:20	1		0	CHILD IS FINE AND BLISTER PACK COLLECTED.	2018-07-27 00:00:16	1		0	CHILD IS FINE AND BLISTER PACK COLLECTED	2018-08-24 00:00:12	3	3	3	9	2018-06-11	2018-09-16	Completed
2001	1		0		2016-04-10 23:58:57	1		0		2016-05-09 00:01:04	1		0		2016-06-06 00:01:00	3	3	3	9	2016-03-24	2016-06-30	Completed
2002	1		0		2016-04-12 00:00:45	1		0	CHILD IS FINE AND BLISTER PACK COLLECTED	2016-05-10 00:00:40	1		0		2016-06-06 00:01:00	3	3	3	9	2016-03-25	2016-06-30	Completed
2003	1		0		2016-04-14 23:59:34	1		0	BLISTER PACK COLLECTED	2016-05-17 00:00:07	1		0		2016-06-10 23:59:02	3	3	3	9	2016-03-29	2016-07-05	Completed
2004	1		0		2016-04-18 00:00:34	1		0		2016-05-16 00:00:30	1		0		2016-06-13 00:00:26	3	3	3	9	2016-03-31	2016-07-07	Completed
2005	1		0		2016-04-21 23:59:00	1		0		2016-05-19 23:58:56	1		0	CHILD IS FINE, NO COMPLAITS RAISED. MOTHER HAS BEEN ADVISED TO CONE WITH THE CHILD ON 11 JULY FOR END OF STUDY VISIT.	2016-06-17 00:01:03	3	3	3	9	2016-04-04	2016-07-13	Completed
2006	1		0		2016-04-25 00:00:01	1		0	CHILD IS FINE AND BLISTER PACK COLLECTED	2016-05-21 00:00:44	1		0		2016-06-18 00:00:39	3	3	3	9	2016-04-06	2016-07-12	Completed
2007	1		0		2016-05-02 23:59:03	1		0		2016-05-28 00:00:10	1		0		2016-06-25 00:00:06	3	3	3	9	2016-04-13	2016-07-18	Completed
2008	1		0		2016-05-09 00:01:04	1		0		2016-06-06 00:01:00	2	The mother only started administering the drugs on 4 July 2016.		Study end on 2 Aug 2016	2016-07-04 00:00:56	3	3	0	6	2016-04-21	2016-07-28	Completed
2009	1		0		2016-05-28 00:00:10	1		0	THE CHILD IS FINE, NO COMPLAINTS RAISED.	2016-06-24 00:00:29	1		0	THE CHILD IS FINE, NO COMPLANTS RAISED	2016-07-22 00:00:25	3	3	3	9	2016-05-10	2016-08-15	Completed
2010	2	MOTHER NOT AT HOME		DID NOT COLLECT THE PILL PACK BECAUSE MOTHER WAS NOT AT HOME.	2016-06-27 23:58:55	1		0	CHILD IS FINE, NO COMPLAINTS RAISED	2016-07-24 23:59:14	1		0	PILL PACK NOW COLLECTED DURING WEEK 10 HOME VISIT. DURING WEEK 2 AND WEEK 6 FOLLOW-UPS, THE PILL PACK WAS NOT COLLECTED BECAUSE IT WAS LEFT IN ANOTHER VILLAGE.		0	3	3	6	2016-06-10	2016-09-20	Completed
2011	1		0	CHILD IS FINE, NO COMPLAINTS RAISED	2016-07-28 23:59:51	1		0	Child is fine	2016-08-25 23:59:47	1		0	THE CHILD IS FINE, AND PILL PACK COLLECTED	2016-09-22 23:59:43	3	3	3	9	2016-07-12	2016-10-18	Completed
2012	1		0	CHILD IS FINE	2016-08-18 00:00:45	1		0	THE CHILD IS FINE, NO COMPLAITS RAISED. PILL PACK COLLECTED	2016-09-16 00:00:17	1		0	CHILD IS FINE WAS ADMITTED BUT DISCHARGED	2016-10-13 00:00:36	3	3	3	9	2016-08-01	2016-11-11	Completed
2013	1		0	HOME VISIT DONE, CHILD IS FINE, NO COMPLAINTS RAISED, PILL PACK COLLECTED.	2016-09-20 00:00:54	1		0	THE CHILD IS FINE NO COMPLAINTS RAISED, PILL PACK COLLECTED.	2016-10-18 00:00:50	1		0	HOME VISIT DONE, CHILD IS FINE AND PILL PACK COLLECTED	2016-11-13 23:58:58	3	3	3	9	2016-09-02	2016-12-09	Completed
2014	1		0	CHILD IS FINE, NO COMPLAINTS RAISED. PILL PACK COLLECTED.	2016-10-18 00:00:50	1		0	HOME VISIT DONE, CHILD IS FINE AND PILL PACK COLLECTED	2016-11-13 23:58:58	1		0	CHILD IS FINE, NO COMPLAINTS RAISED. PILL PACK COLLECTED.	2016-12-12 00:01:05	3	3	3	9	2016-09-29	2017-01-05	Withdraw Consent
2015	1		0	CHILD IS FINE, NO COMPLAINTS RAISED. PILL PACK COLLECTED.	2016-10-25 00:00:16	1		0	CHILD IS FINE, NO COMPLAINTS RAISED. PILL PACK COLLECTED.	2016-11-22 00:00:12	1		0	THE CHILD IS FINE, NO COMPLAINTS RAISED.	2016-12-20 00:00:08	3	3	3	9	2016-10-07	2017-01-12	Completed
2016	1		0	CHILD IS FINE, NO COMPLAITS RAISED. PILL PACK COLLECTED	2016-11-15 00:00:46	1		0	THE CHILD IS FINE, NO COMPLAINTS RAISED. PILL PACK COLLECTED	2016-12-13 00:00:41	1		0	CHILD IS FINE, NO COMPLAINTS RASED. PILL PACK COLLECTED.	2017-01-10 00:00:37	3	3	3	9	2016-10-28	2017-02-02	Completed
2017	1		0	THE CHILD IS FINE, NO COMPLAINTS RAISED. PILL PACK COLLECTED.	2016-11-17 23:59:35	1		0	CHILD IS FINE, NO COMPLAINTS RAISED. PILL PACK COLLECTED.	2016-12-15 23:59:31	1		0	THE CHILD HAS FEVER AND MOTHER HAS BEEN ADVISED TO TAKE THE CHILD TO THE NEAREST HEALTH CENTRE. PILL PACK COLLECTED	2017-01-12 23:59:27	3	3	3	9	2016-10-31	2017-02-06	Completed
2018	1		0	THE CHILD IS FINE, NO COMPLAINTS RAISED. PILL PACK COLLECTED	2016-11-24 23:59:01	1		0	THE CHILD IS FINE, NO COMPLAINTS RAISED.	2016-12-22 23:58:57	1		0	THE CHILD IS FINE, NO COMPLAINTS RAISED. PILL PACK COLLECTED.	2017-01-20 00:01:04	3	3	3	9	2016-11-07	2017-02-14	Completed
2019	1		0	THE CHILD IS FINE, NO COMPLAINTS RAISED.	2016-12-20 00:00:08	1		0	CHILD IS FINE AND BLISTER PACK COLLECTED	2017-01-17 23:59:40	1		0	TWO BLISTER PACKS COLLECTED, ONE FOR THE PREVIOUS VISIT AND THE OTHER ONE FOR PMC 3 HOME VISIT.	2017-02-23 00:00:50	3	3	3	9	2016-12-02	2017-03-19	Completed
2020	1		0	CHILD IS FINE NO COMPLAINTS RAISED	2016-12-31 00:00:11	1		0	THE CHILD IS FINE, NO COMPLAINTS RAISED. PILL PACK COLLECTED	2017-01-29 23:59:20	1		0	FOLLOW UP DONE AND THE CHILD IS FINE.	2017-02-26 23:59:15	3	3	3	9	2016-12-14	2017-03-23	Completed
2021	1		0	THE CHILD IS FINE, BRISTER PACK COLLECTED.	2017-01-17 00:00:04	1		0	THE CHILD IS FINE, NO COMPLAINTS RAISED.	2017-02-14	1		0	HOME VISIT DONE AND THE CHILD IS FINE. BLISTER PACK COLLECTED.	2017-03-13 00:00:19	3	3	3	9	2016-12-30	2017-04-06	Completed
2022	1		0	PILL PACK COLLECTED AND CHILD IS FINE	2017-01-17 23:59:40	1		0	CHILD IS FINE, NO COMPLAITS RAISED. BLISTER PACK COLLECTED.	2017-02-14 23:59:36	1		0	HOME VISIT DONE AND THE CHILD IS FINE.	2017-03-14 23:59:32	3	3	3	9	2016-12-31	2017-04-06	Completed
2023	1		0	THE CHILD IS FINE, NO COPMLAINTS RAISED. PILL PACK COLLECTED.	2017-01-20 00:01:04	1		0	CHILD IS FINE	2017-02-15 23:59:12	1		0	CHILD IS FINE, NO COMPLAINTS RAISED. BLISTER PACK COLLECTED	2017-03-17 00:00:56	3	3	3	9	2017-01-02	2017-04-10	Completed
2024	1		0	THE CHILD IS FINE, NO COMPLAINTS RAISED. PILL PACK COLLECTED.	2017-01-20 00:01:04	1		0	CHILD IS FINE	2017-02-15 23:59:12	1		0	CHILD IS FINE	2017-03-15 23:59:08	3	3	3	9	2017-01-02	2017-04-10	Completed
2025	1		0	PILL PACK COLLECTED AND THE CHILD IS FINE	2017-01-20 00:01:04	1		0	CHILD IS FINE	2017-02-15 23:59:12	1		0	THE CHILD IS FINE AND THE BLISTER PACK IS COLLECTED	2017-03-17 00:00:56	3	3	3	9	2017-01-02	2017-04-10	Completed
2026	2	FAMILY HAS MOVED		FAMILY HAS MOVED TO MANGOCHI, HENCE NO BLISTER PACK COLLECTED.	2017-01-22 23:59:53	1		0	PARTICIPANT RELOCATED TO MANGOCHI	2017-02-19 23:59:49	2	MOTHER NOT NOT AT HOME		THE FAMILY MOVED TO MANGOCHI, HENCE BLISTER PACK NOT COLLECTED	2017-03-18 00:00:32	0	3	0	3	2017-01-03	2017-02-20	Withdraw Consent
2027	1		0	CHILD IS FINE	2017-02-08 23:59:46	1		0	THE CHILD IS FINE.	2017-03-08 23:59:42	1		0	CHILD IS FINE, NO COMPLAINTS RAISED. BLISTER PACK COLLECTED.	2017-04-06 23:59:14	3	3	3	9	2017-01-23	2017-05-02	Completed
2028	1		0	CHILD IS FINE	2017-02-21 23:59:02	1		0	HOME VISIT DONE AND THE CHILD IS FINE.	2017-03-21 23:58:58	1		0	THE CHILD IS FINE AND BLISTER PACK COLLECTED	2017-04-18 23:58:54	3	3	3	9	2017-02-04	2017-05-12	Completed
2029	1		0	CHILD IS FINE	2017-02-24 00:00:26	1		0	CHILD IS FINE	2017-03-21 23:58:58	1		0	CHILD IS FINE, NO COMPLAINTS RAISED	2017-04-21 00:00:18	3	3	3	9	2017-02-06	2017-05-14	Completed
2030	1		0	THE CHILD IS FINE, NO COMPLAINTS RAISED	2017-02-28 00:01:03	1		0	THE CHILD IS FINE, NO COMPLAINTS RAISED. BLISTER PACK COLLECTED	2017-03-28 00:00:59	1		0	HOME VISIT DONE,THE CHILD IS FINE AND BLISTER PACK IS COLLECTED	2017-04-25 00:00:55	3	3	3	9	2017-02-10	2017-05-19	Completed
2031	2	MOTHER NOT AT HOME		BLISTER PACK NOT COLLECTED BECAUSE MOTHER WAS NOT AT HOME	2017-03-04 23:59:05	1		0	CHILD IS FINE, NO COMPLAINTS RAISED	2017-03-30 23:59:48	1		0	HOME VISIT DONE,THE CHILD IS FINE AND BLISTER PACK COLLECTED	2017-05-02 00:00:21	0	3	3	6	2017-02-15	2017-05-24	Completed
2032	2	MOTHER NOT AT HOME		MOTHER NOT AT HOME	2017-03-04 23:59:05	1		0	CHILD IS FINE. BLISTER PACK COLLECTED	2017-04-01 23:59:01	2	MOTHER WAS NOT AT HOME		BLISTER PACK NOT COLLECTED BECAUSE MOTHER OF THE CHILD HAS MOVED TO LIWONDE.	2017-05-02 00:00:21	0	3	0	3	2017-02-15	2018-03-09	Withdraw Consent
2033	1		0	CHILD IS FINE	2017-03-09 23:59:19	1		0	CHILD IS FINE. BLISTER PACK COLLECTED	2017-04-06 23:59:14	1		0	THE CHILD IS FINE, BLISTER PACK COLLECTED	2017-05-04 23:59:10	3	3	3	9	2017-02-20	2017-05-29	Completed
2034	1		0	CHILD IS FINE AND NO COMPLAINTS. BLISTER PACK COLLECTED	2017-03-13 00:00:19	1		0	CHILD IS SICK JUST COMING FROM THE HOSPITAL. BLISTER PACK COLLECTED	2017-04-10 23:59:51	1		0	HOME VISIT DONE .CHILD IS SICK.	2017-05-08 00:00:11	3	3	3	9	2017-02-22	2017-05-30	Completed
2035	2	MOTHER NOT AT HOME		MOTHER WENT TO LILONGWE WITH THE CHILD.	2017-03-13 00:00:19	2	MOTHER NOT AT HOME		MOTHER NOTBAT HOME SHE IS IN LILONGWE WITH THE CHILD	2017-04-09 00:00:38	2	MOTHER WENT TO LILONGWE		MOTHER WENT TO LILONGWE	2017-05-08 00:00:11	0	0	0	0	2017-02-22	2017-06-04	Withdraw Consent
2036	1		0	CHILD IS FINE, NO COMPLAINTS RAISED. BLISTER PACK COLLECTED.	2017-03-28 00:00:59	1		0	CHILD IS FINE, BLISTER PACK COLLECTED	2017-04-25 00:00:55	1		0	HOME VISIT IS DONE THE CHILD IS FINE AND BLISTER PAVK COLLECTED	2017-05-21 23:59:03	3	3	3	9	2017-03-10	2017-06-16	Completed
2037	1		0	CHILD IS FINE, NO COMPLAINTS RAISED. BLISTER PSCK COLLECTED	2017-03-28 00:00:59	1		0	HOME VISIT DONE,THE CHILD IS FINE AND THE BLISTER PACK COLLECTED	2017-04-25 00:00:55	1		0	HOME VISIT DONE, BLISTER PACK COLLECTED	2017-05-21 23:59:03	3	3	3	9	2017-03-10	2017-06-20	Completed
2038	1		0	CHILD IS FINE	2017-04-03 00:00:49	1		0	CHILD IS FINE AND BLISTER PACK COLLECTED	2017-04-27 23:59:44	1		0	BLISTER PACK COLLECTED AND CHILD IS FINE.	2017-05-25 23:59:40	3	3	3	9	2017-03-14	2017-06-20	Completed
2039	1		0	CHILD IS FINE. BLISTER PACK COLLECTED.	2017-04-03 00:00:49	1		0	CHILD IS FINE AND BLISTER PACK COLLECTED	2017-05-02 00:00:21	1		0	CHILD IS FINE, NO COMPLAINTS RAISED. BLISTER PACK COLLECTED	2017-05-30 00:00:17	3	3	3	9	2017-03-16	2017-06-22	Completed
2040	1		0	CHILD IS FINE AND BLISTER PACK COLLECTED	2017-04-04 00:00:25	1		0	BLISTER PACK COLLECTED AND CHILD IS FINE	2017-05-02 00:00:21	1		0	CHILD IS FINE	2017-05-29 00:00:40	3	3	3	9	2017-03-16	2017-06-29	Completed
2041	1		0	CHILD IS FINE, NO COMPLAINTS RAISED		1		0	CHILD IS FINE AND BLISTER PACK COLLECTED	2017-05-02 00:00:21	1		0	CHILD IS FINE	2017-05-29 00:00:40	3	3	3	9	2017-03-16	2017-06-22	Completed
2042	1		0	CHILD IS FINE AND BLISTER PACK COLLECTED	2017-04-04 00:00:25	1		0	CHILD IS FINE	2017-05-02 00:00:21	1		0	BLISTER PACK COLLECTED	2017-05-29 00:00:40	3	3	3	9	2017-03-17	2017-06-29	Completed
2043	1		0	CHILD IS FINE. BLISTER PACK COLLECTED.	2017-04-05 00:00:02	1		0	CHILD IS FINE AND BLISTER PACK COLLECTED	2017-05-02 23:59:57	2	MOTHER WAS NOT AT HOME		NO BLISTER PACK WAS COLLECTED	2017-05-31 23:59:30	3	3	0	6	2017-03-18	2017-07-13	Completed
2044	1		0	THE CHILD IS FINE	2017-05-02 00:00:21	1		0	BLISTER PACK COLLECTED	2017-05-29 00:00:40	1		0	HOME VISIT IS DONE,THE CHILD IS FINE	2017-06-26 00:00:36	3	3	3	9	2017-04-13	2017-07-19	Completed
2045	2	MOTHER NOT AT HOME		BLISTER PACK NOT COLLECTED BECAUSE MOTHER WAS NOT AT HOME	2017-04-08 00:01:02	2	MOTHER NOT AT HOME		BLISTER PACK NOT COLLECTED BECAUSE MOTHER HAS GONE TO JALI.	2017-05-04 23:59:10	2	MOTHER STILL IN JALI		BLISTER PACK NOT COLLECTED	2017-06-01 23:59:06	0	0	0	0	2017-03-21	2017-06-27	Completed
2046	1		0	THE CHILD IS FINE AND BLISTER PACK IS COLLECTED	2017-04-18 23:58:54	1		0	CHILE IS FINE AND BLISTER PACK COLLECTED	2017-05-15 23:59:13	1		0	CHILD IS FINE AND BLISTER PACK COLLECTED	2017-06-11 23:59:33	3	3	3	9	2017-03-31	2017-07-07	Completed
2047	1		0	CHILD IS FINE	2017-04-20 00:00:41	1		0	CHILD IS FINE, BLISTER PACK COLLECTED	2017-05-19 00:00:14	1		0	CHILD IS FINE AND BLISTER PACK COLLECTED	2017-06-16 00:00:10	3	3	3	9	2017-04-03	2017-07-09	Completed
2048	1		0	CHILD IS FINE, BLISTER PACK COLLECTED.	2017-04-26 00:00:31	1		0	THE CHILD IS FINE AND BLISTER PACK COLLECTED.	2017-05-24 00:00:27	1		0	CHILD IS FINE, BLISTER PACK COLLECTED	2017-06-21 00:00:23	3	3	3	9	2017-04-08	2017-07-14	Completed
2049	1		0	CHILD IS FINE	2017-04-26 00:00:31	1		0	THE CHILD IS FINE	2017-05-23 00:00:51	1		0	BLISTER PACK COLECTED, BLISTER PACK COLLECTED	2017-06-21 00:00:23	3	3	3	9	2017-04-08	2017-07-14	Completed
2050	1		0	HOME VISIT IS DONE,THE CHILD IS FINE AND BLISTER PACK IS COLLECTED	2017-04-27 23:59:44	1		0	THE CHILD IS FINE BLISTER PACK COLLECTED	2017-05-25 23:59:40	1		0	CHILD IS FINE BLISTER PACK COLLECTED.	2017-06-22 23:59:36	3	3	3	9	2017-04-10	2017-07-19	Completed
2051	1		0	HOME VISIT DONE,THE CHILD IS FINE AND BLISTER PACK COLLECTED	2017-04-27 23:59:44	1		0	CHILD IS FINE BLISTER PACK COLLECTED	2017-05-25 23:59:40	1		0	CHILD IS FINE, BLISTER PACK COLLETED	2017-06-22 23:59:36	3	3	3	9	2017-04-10	2017-07-16	Completed
2052	1		0	CHILD IS FINE BLISTER PACK COLLECTED	2017-05-08 00:00:11	1		0	CHILD IS FINE AND BLISTER PACK COLLECTED	2017-06-05 00:00:07	1		0	HOME VISIT DONE AND CHILD IS FINE, BLISTER PACK COLLECTED	2017-07-03 00:00:03	3	3	3	9	2017-04-19	2017-07-25	Completed
2053	1		0	CHILD IS FINE, BLISTER PACK COLLECTED	2017-05-08 23:59:47	1		0	BLISTER PACK COLLECTED AND CHILD IS FINE	2017-06-05 00:00:07	1		0	CHILD IS FINE, BLISTER PACK COLLECTED	2017-07-04 23:59:15	3	3	3	9	2017-04-21	2017-07-27	Completed
2054	1		0	BLISTER PACK COLLECTED AND CHILD IS FINE	2017-05-25 23:59:40	1		0	CHILD IS FINE, BLISTER PACK COLLECTED	2017-06-22 23:59:36	1		0	BLISTER PACK COLLECTED	2017-07-20 23:59:32	3	3	3	9	2017-05-08	2017-08-17	Completed
2055	1		0	HOME VISIT DONE, BLISTER PACK COLLECTED	2017-06-05 00:00:07	1		0	CHILD IS FINE, BLISTER PACK COLLECTED.	2017-07-02 00:00:26	1		0	CHILD IS FINE, AND BLISTER PACK COLLECTED	2017-07-31 23:59:35	3	3	3	9	2017-05-17	2017-05-24	Withdraw Consent
2056	1		0	CHILD IS FINE AND BLISTER PACK COLLECTED	2017-06-18 23:58:59	1		0	CHILD IS FINE AND BLISTER PACK COLLECTED	2017-07-16 23:58:55	1		0	CHILD IS FINE	2017-08-15 00:00:38	3	3	3	9	2017-05-31	2017-09-06	Completed
2057	2	Mother not home		Home visit done ,The child is fine	2017-06-22 23:59:36	1		0	BLISTER PACK COLLECTED	2017-07-20 23:59:32	1		0	CHILD IS FINE	2017-08-16 23:59:51	0	3	3	6	2017-06-05	2017-09-11	Completed
2058	2	MOTHER NOT AT HOME		MOTHER NOT AT HOME	2017-07-10 23:59:05	2	MOTHER NOT AT HOME		BLISTER PACK NOT COLLECTED MOTHER NOT AT HOME	2017-08-07 23:59:01	1		0	CHILD IS FINE AND 3 BLISTER PACK COLLECTED.	2017-09-04 23:58:57	0	0	3	3	2017-06-23	2017-09-29	Completed
2059	1		0	CHILD IS FINE	2017-09-12 00:00:34	1		0	CHILD IS FINE AND BLISTER PACK COLLECTED	2017-10-10 00:00:30	2	MOTHER WAS NOT AT HOME		BLISTER PACK NOT COLLECTED	2017-11-07 00:00:26	3	3	0	6	2017-08-25	2017-11-30	Completed
2060	1		0	CHILD IS FINE AND BLISTER PACK COLLECTED	2017-10-05 00:00:17	1		0	BLISTER PACK COLLECTED AND CHILD IS FINE.	2017-11-02 23:59:49	1		0	CHILD IS FINE AND BLISTER PACK COLLECTED	2017-11-30 23:59:45	3	3	3	9	2017-09-18	2017-12-28	Completed
2061	1		0	CHILD IS FINE AND BLISTER PACK COLLECTED	2018-03-09 00:00:36	1		0	CHILD IS FINE AND BLISTER PACK COLLECTED	2018-04-08 23:59:22	1		0	CHILD IS FINE AND BLISTER PACK COLLECTED	2018-05-05 00:00:05	3	3	3	9	2018-02-20	2018-05-28	Completed
2062	2	MOTHER WAS NOT AT HOME		BLISTER PACK NOT COLLECTED BECAUSE MOTHER WAS NOT AT HOME	2018-04-08 23:59:22	1		0	COLLECTED 2 BLISTER PACKS AND CHILD IS FINE	2018-05-06 23:59:18	1		0	CHILD IS FINE AND BLISTER PACK COLLECTED	2018-06-13 23:59:40	0	3	3	6	2018-03-21	2018-07-09	Completed
2063	1		0	CHILD IS FINE AND BLISTER PACK COLLECTED	2018-04-08 23:59:22	1		0	BLISTER PACK COLLECTED AND CHILD IS FINE	2018-05-08 00:01:05	1		0	BLISTER PACK COLLECTED AND CHILD IS FINE	2018-06-05 00:01:01	3	3	3	9	2018-03-23	2018-06-29	Completed
2064	2	MOTHER WAS NOT AT HOME		BLISTER PACK NOT COLLECTED BECAUSE MOTHER WAS NOT AT HOME.	2018-04-18 23:59:48	1		0	CHILD IS FINE. TWO BLISTER PACKS COLLECTED.	2018-05-16 00:00:08	1		0	CHILD IS FINE AND BLISTER PACK COLLECTED	2018-06-14 23:59:16	0	3	3	6	2018-04-01	2018-07-09	Completed
2065	2	MOTHER OF THE CHILD IS SICK AND HAS GONE TO HER HOME DISTRICT IN PHALOMBE, WILL BE BACK WHEN SHE IS FINE.		BLISTER PACK NOT COLLECTED BECAUSE MOTHER HAS GONE TO PHALOMBE.	2018-05-10 23:59:54	1		0	CHILD IS FINE AND BLISTER PACK COLLECTED TWO BLISTER PACK, ONE FOR THE PREVIOUS VISIT AND THE ONE FOR THE CURRENT ONE.	2018-06-07 23:59:50	2	MOTHER WAS NOT AT HOME HENCE NO BLISTER PACK COLLECTED.		NO BLISTER PACK COLLECTED	2018-07-05 00:00:10	0	3	0	3	2018-04-23	2018-07-29	Completed
2066	1		0	MOTHER COMPLAINED THAT THE CHILD IS NOT ABLE TO THINGS PROPERLY LIKE BEFORE.ADVISED TO COME AT THE STUDY CLINIC FOR FURTHER INVESTIGATIONS.	2018-05-17 23:59:21	1		0	BLISTER PACK COLLECTED AND CHILD IS FINE	2018-06-16 00:01:04	1		0	BLISTER PACK COLLECTED AND CHILD IS FINE	2018-07-12 23:59:12	3	3	3	9	2018-05-01	2018-08-07	Completed
2067	1		0	BLISTER PACK COLLECTED AND CHILD IS FINE	2018-05-22 23:59:34	1		0	BLISTER PACK COLLECTED AND CHILD IS FINE	2018-06-19 23:59:30	1		0	CHILD IS FINE AND BLISTER PACK COLLECTED	2018-07-17 23:59:26	3	3	3	9	2018-05-05	2018-08-09	Completed
2068	1		0	BLISTER PACK COLLECTED AND CHILD IS FINE	2018-06-01 00:00:24	1		0	CHILD IS FINE AND BLISTER COLLECTED	2018-06-29 00:00:20	1		0	CHILD IS FINE AND BLISTER PACK COLLECTED	2018-07-27 00:00:16	3	3	3	9	2018-05-15	2018-08-20	Completed
2069	1		0	CHILD IS FINE AND BLISTER PACK COLLECTED	2018-06-13 00:00:04	1		0	CHILD IS FINE AND BLISTER PACK COLLECTED	2018-07-11	1		0	CHILD IS FINE	2018-08-07 23:59:55	3	3	3	9	2018-05-26	2018-08-30	Completed
2070	1		0	BLISTER PACK COLLECTED AND CHILD IS FINE	2018-06-19 23:59:30	1		0	CHILD IS FINE AND BLISTER PACK COLLECTED	2018-07-17 23:59:26	1		0	CHILD IS FINE	2018-08-14 23:59:22	3	3	3	9	2018-06-02	2018-09-05	Completed
2071	1		0	CHILD IS FINE AND BLISTER PACK COLLECTED	2018-06-22 00:00:54	1		0	CHILD IS FINE AND BLISTER PACK COLLECTED	2018-07-20 00:00:50	1		0	CHILD IS FINE AND BLISTER COLLECTED	2018-08-18 00:00:22	3	3	3	9	2018-06-05	2018-09-10	Completed
2072	1		0	BLISTER PACK COLLECTED AND CHILD IS FINE	2018-07-05 23:59:46	1		0	BLISTER PACK COLLECTED AND CHILD IS FINE	2018-08-02 23:59:42	1		0	CHILD IS FINE AND BLISTER PACK COLLECTED	2018-08-30 23:59:38	3	3	3	9	2018-06-19	2018-09-25	Completed
2073	1		0	CHILD IS FINE AND BLISTER PACK COLLECTED	2018-07-16 00:00:13	1		0	CHILD IS FINE	2018-08-07 00:00:19	1		0	CHILD IS FINE AND BLISTER PACK COLLECTED	2018-09-06 23:59:04	3	3	3	9	2018-06-22	2018-10-02	Completed
2074	1		0	CHILD IS FINE AND BLISTER PACK COLLECTED	2018-07-12 23:59:12	2	MOTHER WAS NOT AT HOME		BLISTER PACK NOT COLLECTED BECAUSE MOTHER WAS NOT AT HOME.	2018-08-09 23:59:08	1		0	HOME VISIT DONE AND CHILD IS FINE.	2018-09-06 23:59:04	3	0	3	6	2018-06-25	2018-10-01	Completed
3001	1		0		2016-04-10 23:58:57	1		0		2016-05-09 00:01:04	1		0		2016-06-06 00:01:00	3	3	3	9	2016-03-24	2016-06-30	Completed
3002	1		0		2016-04-14 23:59:34	1		0		2016-05-12 23:59:30	1		0		2016-06-10 23:59:02	3	3	3	9	2016-03-29	2016-07-05	Completed
3003	1		0		2016-04-18 00:00:34	1		0		2016-05-16 00:00:30	1		0		2016-06-13 00:00:26	3	3	3	9	2016-03-31	2016-07-07	Completed
3004	1		2		2016-04-25 00:00:01	1		3	CHILD IS FINE AND BLISTER PACK COLLECTED	2016-05-21 00:00:44	1		3		2016-06-18 00:00:39	1	0	0	1	2016-04-06	2016-07-13	Completed
3005	1		0	CHILD IS FINE AND BLISTER PACK COLLECTED	2016-05-06 00:00:04	1		0		2016-06-03	1		0		2016-06-30 23:59:55	3	3	3	9	2016-04-19	2016-07-26	Completed
3006	1		0		2016-05-09 00:01:04	1		0	THE CHILD IS FINE, NO COMPLAITS RAISED	2016-06-06 00:01:00	1		0		2016-07-04 00:00:56	3	3	3	9	2016-04-21	2016-07-28	Completed
3007	1		0		2016-05-11 23:59:53	1		0	CHILD IS FINE NO COMPLAITS RAISED	2016-06-09 23:59:26	1		0		2016-07-07 23:59:22	3	3	3	9	2016-04-25	2016-08-08	Completed
3008	1		0		2016-05-12 23:59:30	1		0	CHILD IS FINE NO COMPLAITS RAISED.	2016-06-09 23:59:26	1		0		2016-07-07 23:59:22	3	3	3	9	2016-04-26	2016-08-02	Completed
3009	1		0		2016-05-28 00:00:10	1		1	MOTHER DID NOT GIVE MEDICATION TO THE CHILD WITH NO REASON.NO COMPLAINT RAISED.	2016-06-25 00:00:06	1		0	CHILD IS FINE	2016-07-23 00:00:02	3	2	3	8	2016-05-11	2016-08-14	Completed
3010	1		0	THE CHILD IS FINE, TOOK THE STUDY DRUGS WITHOUT ANY PROBLEM.	2016-05-29 23:59:23	1		0	CHILD IS FINE, NO COMPLAINTS RAISED.	2016-06-26 23:59:19	1		0	CHILD IS FINE	2016-07-24 23:59:14	3	3	3	9	2016-05-12	2016-08-21	Completed
3011	1		0	THE CHILD IS FINE, TOOK ALL THE DRUGS WITHOUT ANY PROBLEM. PILL PACK COLLECTED.	2016-05-29 23:59:23	2	THE CHILD IS NOW STAYING WITH HIS MOTHER IN CHILOMONI IN BLANTYRE		HAS MISSED THE WEEK 6 HOME VISIT FOLLOW-UP BECAUSE THE CHILD IS NOW STAYING IN BLANTYRE.	2016-06-26 23:59:19	2	CHILD IS STILL IN BLANTYRE		CHILD IS STAYING WITH HIS MOTHER IN BLANTYRE.	2016-07-24 23:59:14	3	0	0	3	2016-05-12	2016-09-19	Withdraw Consent
3012	1		0		2016-06-03	1		0	CHILD IS FINE	2016-06-30 23:59:55	1		0	CHILD FINE	2016-07-28 23:59:51	3	3	3	9	2016-05-17	2016-08-23	Completed
3013	1		0	HOME VISIT WEEK 2 DONE. CHILD IS FINE, MOTHER GAVE THE CHILD DRUGS FROM 2 PILL PACKS, WITHOUT FOLLOWING INSTRUCTIONS. ONLY ONE PILL PACK WAS COLLECTED, THE OTHER PILL PACK COULD NOT BE FOUND.	2016-06-06 00:01:00	2	MOTHER LOST THE STUDY DRUGS		BLISTER PACK NOT COLLECTED	2016-07-04 00:00:56	2	THE MOTHER LOST THE PILL PACK.		THE CHILD DID NOT TAKE THE DRUGS BECAUSE THE MOTHER MISPLACED THE PILL PACK.	2016-08-02 00:00:28	3	0	0	3	2016-05-19	2016-08-29	Completed
3014	1		0		2016-06-13 00:00:26	1		0	THE CHILD IS FINE, NO COMPLAINTS RAISED	2016-07-11 00:00:22	1		0	THE CHILD IS FINE, NO COMPLAINTS RAISED	2016-08-08 00:00:18	3	3	3	9	2016-05-26	2016-09-05	Completed
3015	1		0	THE CHILD IS FINE, NO COMPLAITS RAISED.	2016-06-20 23:59:29	1		0	MOTHER SAID THAT CHILD VOMITTED STUDY DRUG SOON AFTER TAKING THE MEDICATION.	2016-07-17 23:59:48	1		0	THE CHILD IS FINE, NO COMPLAITS RAISED. PILL PACK COLLECTED.	2016-08-15 23:59:21	3	3	3	9	2016-06-03	2016-09-01	Completed
3016	1		0		2016-07-05 00:00:32	1		0	BLISTER PACK COLLECTED, CHILD IS FINE	2016-08-02 00:00:28	1		0	THE CHILD IS FINE, NO COMPLAINTS RAISED. PILL PACK COLLECTED,	2016-08-30 00:00:24	3	3	3	9	2016-06-17	2016-09-22	Completed
3017	1		0	THE CHILD IS FINE, NO COMPLAINTS RAISED.	2016-07-15 00:00:59	1		0	CHILD IS FINE	2016-08-12 00:00:55	2	CHILD NOT AT HOME		MOTHER WENT TO LIWONDE WITH THE CHILD.	2016-09-09 00:00:51	3	3	0	6	2016-06-28	2016-10-13	Withdraw Consent
3018	1		0	CHILD FINE NO COMPLAINTS RAISED	2016-07-16 00:00:35	1		0	Child fine	2016-08-13 00:00:31	1		0	NO COMPLAINTS.CHILD IS FINE	2016-09-11 00:00:04	3	3	3	9	2016-06-29	2016-10-19	Completed
3019	1		0	CHILD FINE NO COMPLAINT RAISED	2016-07-16 00:00:35	1		0	Child fine	2016-08-13 00:00:31	1		0	NO COMPLAINTS.CHILD IS FINE.	2016-09-11 00:00:04	3	3	3	9	2016-06-29	2016-10-04	Completed
3020	1		0	THE CHILD IS FINE, NO COMPLAINTS RAISED. PILL PACK COLLECTED	2016-09-20 00:00:54	1		0	CHILD IS FINE		1		0	CHILD IS FINE		3	3	3	9	2016-09-02	2016-12-14	Completed
3021	1		0	CHILD IS FINE NO COMPLAINT RAISED	2016-09-26 00:00:44	1		0	CHILD IS FINE	2016-10-25 00:00:16	1		0	CHILD IS FINE, NO COMPLAINTS RAISED.	2016-11-22 00:00:12	3	3	3	9	2016-09-09	2016-12-15	Completed
3022	1		3	CHILD IS FINE, NO COMPLAINTS RAISED. PILL PACK COLLECTED.	2016-10-14 00:00:13	1		3	THE CHILD IS FINE, NO COMPLAINTS RAISED. PILL PACK COLLECTED.	2016-11-11 00:00:09	1		3	CHILD IS FINE, NO COMPLAINTS RAISED. BLISTER PACK COLECTED.	2016-12-09 00:00:05	0	0	0	0	2016-09-26	2017-01-02	Completed
3023	1		0	CHILD IS FINE, DID NOT VOMIT THE STUDY DRUGS AND NO COMPLAINTS RAISED. PILL PACK COLLECTED.	2016-10-19 00:00:26	1		0	HOME VISIT DONE, CHILD IS FINE AND PILL PACK COLLECTED	2016-11-13 23:58:58	1		0	THE CHILD IS FINE, NO COMPLAINTS RAISED, PILL PACK COLLECTED.	2016-12-13 00:00:41	3	3	3	9	2016-09-30	2017-01-06	Completed
3024	1		0	CHILD IS FINE	2016-10-19 00:00:26	2	MOTHER NOT AT HOME		THE FOLLOW UP WAS NOT DONE BECAUSE THE MOTHER HAD GONE TO RECIEVE RELIEF FOOD.	2016-11-13 23:58:58	2	MOTHER WAS NOT AT HOME		BLISTER PACK NOT COLLECTED	2016-12-13 00:00:41	3	0	0	3	2016-09-30	2017-01-06	Completed
3025	2	MOTHER NOT AT HOME		MOTHER WENT TO ULUMBA TO CULTIVATE IN THE MAIZE FIELD.	2016-11-07 23:59:08	1		0	THE CHILD IS FINE, NO COMPLAINTS RAISED. PILL PACK COLLECTED. THE OTHER BLISTER PACK FROM THE PREVIOUS VISIT (PMC 1) WAS ALSO COLLECTED.	2016-12-04 23:59:28	1		0	CHILD IS FINE	2017-01-02 23:59:00	0	3	3	6	2016-10-20	2017-01-26	Completed
3026	1		0	CHILD IS FINE, NO COMPLAINTS RAISED	2016-11-11 00:00:09	1		0	CHILD IS FINE, NO COMPLAINTS RAISED. BLISTER PACK COLLECTED	2016-12-09 00:00:05	1		0	THE CHILD IS FINE, NO COMPLAINTS RAISED.	2017-01-06 00:00:01	3	3	3	9	2016-10-24	2017-01-29	Completed
3027	1		0	CHILD IS FINE, NO COMPLAINTS RAISED	2016-11-13 23:58:58	1		0	THE CHILD IS FINE, NO COMPLAINTS RAISED. PILL PACK COLLECTED.	2016-12-13 00:00:41	1		0	BLISTER PACK COLLECTED AND THE CHILD IS FINE	2017-01-10 00:00:37	3	3	3	9	2016-10-28	2017-02-02	Completed
3028	1		0	CHILD IS FINE, BLISTER PACK COLLECTED	2017-01-12 23:59:27	1		0	CHILD HAS FEVER AND RUNNING NOSE FOR 4 DAYS. MOTHER ADVISED TO SEEK MEDICAL ATTENTION. PILL PACK COLLECTED.	2017-02-12 00:00:47	2	MOTHER NOT AT HOME		BLISTER PACK NOT COLLECTED BECAUSE MOTHER WAS NOT AT HOME	2017-03-09 23:59:19	3	3	0	6	2016-12-26	2017-04-10	Completed
3029	1		0	CHILD IS FINE, PILL PACK COLLECTED	2017-01-15 00:00:51	1		0	CHILD IS FINE AND BLISTER PACK COLLECTED	2017-02-12 00:00:47	1		0	CHILD IS FINE, NO COMPLAINTS RAISED. BLISTER PACK COLLECTED	2017-03-13 00:00:19	3	3	3	9	2016-12-28	2017-04-05	Completed
3030	2	MOTHER WAS NOT AT HOME		THE BLISTER PACK WAS NOT COLLECTED BECAUSE THE MOTHER WAS NOT HOME.	2017-01-17 23:59:40	1		0	THE CHILD IS FINE, NO COMPLAINTS RAISED. 2 BLISTER PACKS HAVE BEEN COLLECTED.	2017-02-14	1		0	THE CHILD IS FINE, NO COMPLAINTS RAISED. BLISTER PACK COLLECTED.	2017-03-13 00:00:19	0	3	3	6	2016-12-29	2017-04-05	Completed
3031	1		0	THE CHILD IS FINE, NO COMPLAINTS RAISED. PILL PACK COLLECTED.	2017-01-17 00:00:04	1		0	THE CHILD IS FINE, NO COMPLAINTS RAISED. PILL PACK COLLECTEDL	2017-02-18 00:00:36	1		0	THE CHILD IS FINE, NO COMPLAINTS RAISED. BLISTER PACK COLLECTED.	2017-03-13 23:59:55	3	3	3	9	2016-12-30	2017-04-06	Completed
3032	1		0	THE CHILD IS FINE, NO COMPLAINTS RAISED. THE MOTHER GAVE THE CHILD ALL THE STUDY DRUGS ONCE A DAY FOR NINE DAYS. ALL THE PILL PACKS HAVE BEEN COLLECTED.	2017-01-20 00:01:04	1		0	CHILD IS FINE	2017-02-17 00:01:00	1		0	THE CHILD IS FINE, NO COMPLAINTS RAISED.	2017-03-17 00:00:56	3	3	3	9	2017-01-02	2017-04-10	Completed
3033	1		0	THE CHILD IS FINE, NO COMPLAINTS RAISED, PILL PACK COLLECTED.	2017-01-22 00:00:17	1		0	CHILD IS FINE AND BLISTER PACK COLLECTED	2017-02-19 23:59:49	1		0	THE CHILD IS FINE, NO COMPLAINTS RAISED. BLISTER PACK COLLECTED.	2017-03-19 00:00:09	3	3	3	9	2017-01-04	2017-04-11	Completed
3034	1		0	CHILD IS FINE, NO COMPLAINTS RAISED.	2017-01-22 23:59:53	1		0	CHILD IS FINE	2017-02-19 23:59:49	1		0	CHILD IS FINE, NO COMPLAINTS RAISED. BLISTER PACK COLLECTED.	2017-03-19 23:59:45	3	3	3	9	2017-01-05	2017-04-12	Completed
3035	1		0	THE CHILD IS FINE, NO COMPLAITS RAISED, PILL PACK COLLECTED.	2017-01-22 23:59:53	1		0	CHILD IS FINE	2017-02-19 23:59:49	1		0	THE CHILD IS FINE, BLISTER PACK COLLECTED	2017-03-19 23:59:45	3	3	3	9	2017-01-05	2017-04-12	Completed
3036	1		0	BLISTER PACK COLLECTED, THE CHILD HAS A COUGH SINCE 28/01/2017	2017-01-29 23:59:20	1		0	CHILD IS FINE, BLISTER PACK COLLECTED	2017-02-26 23:59:15	1		0	CHILD IS FINE	2017-03-26 23:59:11	3	3	3	9	2017-01-11	2017-04-18	Completed
3037	1		0	THE CHILD IS FINE, NO COMPLAINTS RAISED. PILL PACK COLLECTED.	2017-02-01 00:00:44	1		0	THE CHILD IS FINE AND TWO BLISTER PACK COLLECTED FOR WEEK 2 AND FOR WEEK 6	2017-02-28 00:01:03	1		0	CHILD IS FINE AND BLISTER PACK COLLECTED	2017-03-29 00:00:35	3	3	3	9	2017-01-14	2017-04-21	Completed
3038	2	MOTHER MISPLACED THE BLISTER PACK AFTER THE CHILD HAD TAKEN THE DRUGS		DID NIT COLLECTE THE PILL PACK BECAUSE MOTHER LOST THE EMPTY PILL PACK.	2017-02-02 23:59:56	1		0	HOME VISIT DONE AND THE CHILD IS FINE. BLISTER PACK COLLECTED.	2017-03-02 00:00:16	1		0	CHILD IS FINE, NO COMPLAINTS RAISED BLISTERACK COLLECTED	2017-03-30 23:59:48	0	3	3	6	2017-01-16	2017-04-23	Completed
3039	1		0	CHILD IS FINE, NO COMPLAINTS RAISED.	2017-02-03 23:59:33	1		0	CHILD IS FINE AND BLISTER PACK COLLECTED	2017-03-06 00:00:53	1		0	THE CHILD IS FINE, NO COMPLAINTS RAISED. BLISTER PACK COLLECTED.	2017-03-31 23:59:25	3	3	3	9	2017-01-17	2017-04-27	Completed
3040	1		0	THE CHILD IS FINE, NO COMPLAINTS RAISED. BLISTER PACK COLLECTED.	2017-02-04 23:59:09	1		0	BLISTER PACK COLLECTED AND CHILD IS FINE	2017-03-06 00:00:53	1		0	CHILD IS FINE AND BLISTER PACK COLLECTED	2017-03-31 23:59:25	3	3	3	9	2017-01-18	2017-04-26	Completed
3041	2	THE MOTHER AND THE CHILD WAS NOT AT HOME		MOTHER WAS NOT AT HOME, HENCE BLISTER PACK WAS NOT COLLECTED	2017-02-07 00:00:33	1		0	CHILD IS FINE AND BLISTER BPACK COLLECTED	2017-03-08 00:00:06	1		0	THE CHILD IS FINE, NO COMPLAINTS RAISED. BLISTER PACK COLLECTED.	2017-04-04 00:00:25	0	3	3	6	2017-01-20	2017-04-27	Completed
3042	1		0	CHILD IS FINE	2017-02-08 23:59:46	1		0	CHILD IS FINE	2017-03-08 23:59:42	2	MOTHER NOT AT HOME		BLISTER PACK NOT COLLECTED BECAUSETHE MOTHER HAD GONE TO HARVEST IN HER MAIZE FIELD.	2017-04-06 23:59:14	3	3	0	6	2017-01-23	2017-05-02	Completed
3043	1		0	CHILD IS FINE AND BLISTER PACK COLLECTED.	2017-03-07 00:00:29	1		0	CHILE IS FINE, NO COMPLAINTS RAISED. BLISTER PACK COLLECTED.	2017-04-04 00:00:25	1		0	CHILD IS FINE	2017-05-02 00:00:21	3	3	3	9	2017-02-17	2017-05-25	Completed
3044	1		0	CHILD IS FINR	2017-03-13 23:59:55	1		0	THE CHILD IS FINE AND BLISTER PACK COLLECTED	2017-04-10 23:59:51	1		0	BLISTER PACK COLLECTED	2017-05-09 23:59:24	3	3	3	9	2017-02-25	2017-06-05	Completed
3045	1		0	CHILD IS FINE, NO COMPLAINTS RAISED.	2017-03-30 00:00:12	2	MOTHER WAS NOT AT HOME		BLISTER PACK NOT COLLECTED	2017-04-26 00:00:31	1		0	CHILD IS FINE, AND BLISTER PACK COLLECTED	2017-05-25 23:59:40	3	0	3	6	2017-03-12	2017-06-22	Completed
3046	1		0	CHILD IS FINE, BLISTER PACK COLLECTED.	2017-03-30 00:00:12	1		0	HOME VISIT DONE ,THE CHILD IS FINE AND BLISTER PACK COLLECTED	2017-04-26 00:00:31	1		0	HOME VISIT DONE,THE CHILD IS FINE AND BLISTER PACK COLLECTED	2017-05-24 00:00:27	3	3	3	9	2017-03-12	2017-06-22	Completed
3047	1		0	CHILD IS FINE, NO COMPLAINTS RAISED, BLISTER PACK COLLECTED.	2017-03-30 23:59:48	1		0	CHILD IS FINE, BLISTER PACK COLLECTED	2017-04-27 23:59:44	2	MOTHER WAS NOT AT HOME		BLISTER PACK NOT COLLECTED BECAUSE MOTHER WAS NOT AT HOME.	2017-05-25 00:00:04	3	3	0	6	2017-03-13	2017-06-26	Completed
3048	1		0	CHILD IS FINE	2017-04-03 00:00:49	1		0	CHILD IS FINE AND BLISTER PACK COLLECTED	2017-04-27 23:59:44	1		0	HOME VISIT DONE AND BLISTER PACK COLLECTED.	2017-05-25 23:59:40	3	3	3	9	2017-03-14	2017-06-20	Completed
3049	1		0	CHILD IS FINE AND BLISTER PACK HAS BEEN COLLECTED	2017-04-04 00:00:25	1		0	HOME VISIT DONE,THE CHILD IS FINE AND BLISTER PACK IS COLLECTED	2017-05-02 00:00:21	1		0	BLISTER PACK COLLECTED	2017-05-29 00:00:40	3	3	3	9	2017-03-17	2017-07-01	Completed
3050	1		0	THE CHILD IS FINE, NO COMPLAINTS RAISED. BLISTER PACK COLLECTED.	2017-04-06 23:59:14	1		0	HOME VISIT DONE,THE CHILD IS FINE AND BLISTER PACK COLLECTED	2017-05-04 23:59:10	1		0	CHILD IS FINE AND BLISTER PACK COLLECTED	2017-06-01 23:59:06	3	3	3	9	2017-03-20	2017-06-26	Completed
3051	1		0	CHILD IS FINE	2017-04-09 00:00:38	1		0	HOME VISIT DONE BLISTER PACK COLLECTED	2017-05-08 00:00:11	1		0	CHILD IS FINE	2017-06-05 00:00:07	3	3	3	9	2017-03-23	2017-06-28	Completed
3052	2	MOTHER NOT AT HOME		BLISTER PACK NOT COLLECTED MOTHER NOT AT HOME	2017-04-17 23:59:18	1		0	CHILD IS FINE AND BLISTER PACK COLLECTED	2017-05-13 00:00:24	2	PARENTS NOT AT HOME		BLISTER PACK NOT COLLECTED	2017-06-10 23:59:56	0	3	0	3	2017-03-29	2017-07-14	Completed
3053	1		0	CHILD IS FINE	2017-04-17 23:59:18	2	MOTHER WAS NOT AT HOME		BLISTER PACK NOT COLLECTED HENCE, NO BLISTER PACK COLLECTED	2017-05-15 23:59:13	1		0	CHILD IS FINE AND BLISTER PACK COLLECTED	2017-06-11 23:59:33	3	0	3	6	2017-03-30	2017-07-07	Completed
3054	1		0	CHILD IS FINE	2017-04-17 23:59:18	1		0	CHILD IS FINE, BLISTER PACK COLLECTED.	2017-05-15 23:59:13	1		0	THE CHILD IS FINE AND BLISTER PACK COLLECTED	2017-06-12 23:59:09	3	3	3	9	2017-03-31	2017-07-10	Completed
3055	1		0	HOME VISIT DONE,THE CHILD IS FINE AND BLISTER PACK COLLECTED	2017-05-04 23:59:10	1		0	CHILD IS FINE AND BLISTER PACK COLLECTED	2017-06-01 23:59:06	1		0	HOME VISIT DONE THE CHILD IS FINE	2017-07-03 00:00:03	3	3	3	9	2017-04-18	2017-07-25	Completed
3056	1		0	CHILD IS FINE AND BLISTER PACK COLLECTED	2017-05-15 23:59:13	1		0	CHILD IS FINE AND BLISTER PACK COLLECTED	2017-06-11 23:59:33	1		0	CHILD IS FINE AND BLISTER PACK COLLECTED	2017-07-09 23:59:29	3	3	3	9	2017-04-27	2017-08-07	Completed
3057	2	MOTHER WAS NOT AT HOME		BLISTER PACK NOT COLLECTED BECAUSE MOTHER WAS NOT AT HOME	2017-05-17 00:01:01	2	MOTHER NOT AT HOME		MOTHER NOT AT HOME	2017-06-14 00:00:57	1		0	HOME VISIT DONE, AND BLISTER PACK COLLECTED	2017-07-12 00:00:53	0	0	3	3	2017-04-29	2017-08-03	Completed
3058	1		0	HOME VISIT DONE AND CHILD IS FINE. BLISTER PACK COLLECTED	2017-05-21 23:59:03	1		0	CHILD IS FINE AND BLISTER PACK COLLECTED	2017-06-18 23:58:59	1		0	CHILD IS FINE, BLISTER PACK COLLECTED	2017-07-16 23:58:55	3	3	3	9	2017-05-03	2017-08-09	Completed
3059	1		0	CHILD IS FINE	2017-06-10 23:59:56	1		0	CHILD IS FINE AND BLISTER PACK COLLECTED	2017-07-09 23:59:29	1		0	CHILD IS FINE	2017-08-06 23:59:25	3	3	3	9	2017-05-24	2017-08-29	Completed
3060	2	MOTHER NOT AT HOME		BLISTER PACK NOT COLLECTED BECAUSE MOTHER WAS NOT AT HOME	2017-06-11 23:59:33	2	MOTHER NOT AT HOME		MOTHER NOT AT HOME	2017-07-09 23:59:29	1		0	CHILD IS FINE AND BLISTER PACK COLLECTED	2017-08-06 23:59:25	0	0	3	3	2017-05-25	2017-08-31	Completed
3061	1		0	CHILD IS FINE AND BLISTER PACK COLLECTED	2017-06-07 23:58:56	1		0	CHILD IS FINE, BLISTER PACK COLLECTED	2017-07-09 23:59:29	1		0	CHILD IS FINE AND BLISTER PACK COLLECTED	2017-08-07 23:59:01	3	3	3	9	2017-05-25	2017-08-31	Completed
3062	1		0	CHILD IS FINE AND BLISTER PACK COLLECTED	2017-06-18 23:58:59	1		0	CHILD IS FINE AND BLISTER PACK COLLECTED	2017-07-16 23:58:55	2	MOTHER NOT AT HOMR		BLISTER PACK NOT COLLECTED MOTHER NOT AT HOME BUT THE CHILD IS FINE	2017-08-14 00:01:02	3	3	0	6	2017-06-01	2017-09-07	Completed
3063	1		0	CHILD IS FINE AND BLISTER PACK COLLECTED	2017-06-20 00:00:47	1		0	CHILD IS FINE AND BLISTER PACK COLLECTED	2017-07-18 00:00:43	1		0	CHILD IS FINE.	2017-08-14 00:01:02	3	3	3	9	2017-06-02	2017-09-07	Completed
3064	1		0	HOME VISIT DONE,THE CHILD IS FINE	2017-07-03 00:00:03	1		0	CHILD IS FINE, AND BLISTER PACK COLLECTED	2017-07-31 23:59:35	1		0	CHILD IS FINE	2017-08-28 23:59:31	3	3	3	9	2017-06-15	2017-09-20	Completed
3065	1		0	HOME VISIT DONE THE CHILD IS FINE BLISTER PACK COLLECTED	2017-07-10 23:59:05	1		0	BLISTER PACK COLLECTED	2017-08-07 23:59:01	1		0	CHILD IS FINE, COLLECTED 2 BLISTER PACKS	2017-09-04 23:58:57	3	3	3	9	2017-06-23	2017-09-29	Completed
3066	1		0	CHILD IS FINE AND BLISTER PACK COLLECTED	2017-07-19 23:59:55	2	MOTHER FOTGOT TO GIVE THE CHILD MEDICATION ON THE SCHEDULED DAY		MOTHER DID NOT GIVE THE CHILD MEDICATION ON THE SCHEDULED DAY. FOLLOW UP TO BE DONE .	2017-08-16 23:59:51	1		0	COLLECTED 2 BLISTER PACK AND CHILD IS FINE.	2017-09-14 23:59:24	3	0	3	6	2017-07-03	2017-10-09	Completed
3067	1		0	CHILD IS FINE, BLISTER PACK COLLECTED	2017-07-27 23:58:58	1		0	CHILD IS FINE	2017-08-23 23:59:18	1		0	CHILD IS FINE AND BLISTER PACK COLLECTED	2017-09-22 00:01:01	3	3	3	9	2017-07-10	2017-10-16	Completed
3068	1		0	CHILD IS FINE AND BLISTER PACK COLLECTED	2017-09-01 00:00:31	1		0	CHILD IS FINE AND BLISTER PACK COLLECTED	2017-09-29 00:00:27	1		0	CHILD IS FINE AND BLISTER PACK COLLECTED	2017-10-27 00:00:23	3	3	3	9	2017-08-14	2017-11-19	Completed
3069	1		0	CHILD IS FINE AND BLISTER PACK COLLECTED	2017-09-24 23:59:50	1		0	CHILD IS FINE AND BLISTER PACK COLLECTED	2017-10-22 23:59:46	1		0	CHILD IS FINE AND BLISTER PACK COLLECTED	2017-11-20 23:59:19	3	3	3	9	2017-09-07	2017-12-13	Completed
3070	1		0	CHILD IS FINE, AND BLISTER COLLECTED.	2017-10-20 00:00:57	1		0	CHILD IS FINE AND BLISTER PACK COLLECTED	2017-11-17 00:00:53	2	COMREC HAS NOT YET APPROVED THE STUDY RENEWAL.		BLISTER PACK NOT COLLECTED	2017-12-17 23:59:38	3	3	0	6	2017-10-03	2018-01-08	Completed
3071	1		0	CHILD IS FINE AND BLISTER PACK COLLECTED	2017-10-23 23:59:23	1		0	CHILD IS FINE AND BLISTER COLLECTED	2017-11-20 23:59:19	2	COMREC HAS NOT YET APPROVED THE STUDY RE-NEWAL		BLISTER NOT COLLECTED	2017-12-18 23:59:14	3	3	0	6	2017-10-06	2018-01-19	Completed
3072	1		0	BLISTER PACK COLLECTED AND THE CHILD IS FINE.	2018-03-06 23:59:12	1		0	BLISTER PACK COLLECTED	2018-04-03 23:59:08	1		0	CHILD IS FINE AND BLISTER PACK COLLECTED	2018-05-01 23:59:04	3	3	3	9	2018-02-17	2018-05-27	Completed
3073	1		0	BLISTER PACK COLLECTED AND CHILD IS FINE	2018-03-09 00:00:36	1		0	CHILD IS FINE AND BLISTER PACK COLLECTED	2018-04-08 23:59:22	1		0	CHILD IS FINE, AND BLISTER PACK COLLECTED	2018-05-05 00:00:05	3	3	3	9	2018-02-20	2018-05-28	Completed
3074	2	MOTHER LOST THE BLISTER PACK		CHILD VOMITTED FIRST AND SECOND DAY OF DRUG ADMINISTRATION.MOTHER READMINISTERED THE STUDY DRUG . SO THERE ARE FOUR TABLETS REMAINING FOR THE TWO COURSES REMAINING. TO SUPPLY ANOTHER TWO TABLETS DURING NEXT HOME VISIT	2018-04-06 00:00:32	1		0	CHILD IS FINE AND BLISTER PACK COLLECTED	2018-04-29 23:59:51	1		0	CHILD IS FINE, AND BLISTER PACK COLLECTED	2018-05-27 23:59:47	0	3	3	6	2018-03-14	2018-06-19	Completed
3075	1		0	CHILD IS FINE	2018-04-06 00:00:32	1		0	BLISTER PACK COLLECTED AND CHILD IS FINE	2018-04-29 23:59:51	1		0	CHILD IS FINE AND BLISTER PACK COLLECTED	2018-05-27 23:59:47	3	3	3	9	2018-03-15	2018-06-22	Completed
3076	1		0	BLISTER PACK COLLECTED AND CHILD IS FINE	2018-06-18 00:00:17	1		0	CHILD IS FINE AND BLISTER PACK COLLECTED	2018-07-16 00:00:13	1		0	BLISTER PACK COLLECTED AND CHILD IS FINE	2018-08-12 00:00:32	3	3	3	9	2018-05-30	2018-09-04	Completed
3077	2	MOTHER WAS NOT AT HOME.		BLISTER PACK NOT COLLECTED BECAUSE MOTHER HAD GONE TO MANGOCHI.	2018-06-18 00:00:17	1		0	CHILD IS FINE AND COLLECTED 2 BLISTER PACKS. ONE FOR THIS VISIT AND THE OTHER ONE FOR THE PREVIOUS VISIT.	2018-07-16 00:00:13	1		0	CHILD IS FINE AND BLISTER PACK COLLECTED	2018-08-13 00:00:09	0	3	3	6	2018-05-30	2018-09-04	Completed
3078	1		0	BLISTER PACK COLLECTED AND THE CHILD IS FINE	2018-06-19 23:59:30	1		0	CHILD IS FINE AND BLISTER PACK COLLECTED	2018-07-17 23:59:26	1		0	CHILD IS FINE	2018-08-14 23:59:22	3	3	3	9	2018-06-02	2018-09-10	Completed
3079	1		0	CHILD IS FINE AND BLISTER PACK COLLECTED	2018-06-30 23:59:33	1		0	CHILD IS FINE AND BLISTER PACK COLLECTED	2018-07-29 23:59:05	1		0	CHILD IS FINE AND COLLECTED 2 BLISTER PACKS	2018-08-25 23:59:25	3	3	3	9	2018-06-13	2018-09-19	Completed
4001	1		0		2016-04-12 00:00:45	2	THE CLIENT DID NOT FINISH MEDICATION FOLLOW UP TO BE DONE AGAIN ON THURSDAY			2016-05-09 00:01:04	1		0		2016-05-12 23:59:30	3	0	3	6	2016-03-25	2016-07-05	Completed
4002	1		0		2016-04-14 23:59:34	1		0		2016-05-12 23:59:30	1		0		2016-06-10 23:59:02	3	3	3	9	2016-03-29	2016-07-05	Completed
4003	1		0		2016-04-18 00:00:34	1		0		2016-05-16 00:00:30	1		0		2016-07-01 23:59:32	3	3	3	9	2016-03-31	2016-07-07	Completed
4004	1		0		2016-04-18 00:00:34	1		0		2016-05-16 00:00:30	1		0		2016-06-30 00:00:19	3	3	3	9	2016-03-31	2016-07-26	Completed
4005	1		0		2016-04-18 00:00:34	1		0		2016-05-16 00:00:30	1		0		2016-06-13 00:00:26	3	3	3	9	2016-03-31	2016-07-07	Completed
4006	1		0		2016-05-06 00:00:04	1		0		2016-06-03	1		0	CHILD IS FINE	2016-07-01 23:59:32	3	3	3	9	2016-04-19	2016-07-26	Completed
4007	2	MOTHER GAVE THE EMPTY BLISTER PACK TO THE CHILD			2016-05-09 00:01:04	2	MOTHER DID NOT COME FOR DRUG COLLECTION		HOME VISIT NOT DONE	2016-06-06 00:01:00	2	The mother did not come for drug collection for PMC 2 and 3.		Stu	2016-07-04 00:00:56	0	0	0	0	2016-04-21	2016-08-01	Completed
4008	1		1		2016-05-12 23:59:30	1		0		2016-06-25 00:00:06	2	MOTHER SAID THAT SHE DOES NOT KNOW WHERE THE BLISTER PACK IS.		CHILD IS FINE	2016-07-22 00:00:25	2	3	0	5	2016-04-25	2016-08-13	Completed
4009	1		0		2016-05-12 23:59:30	1		0		2016-06-10 23:59:02	1		0		2016-07-07 23:59:22	3	3	3	9	2016-04-26	2016-08-02	Completed
4010	2	THE MOTHER DOESN'T KNOW WHERE THE BLISTER PACK IS.			2016-05-27 00:00:33	1		0	THE CHILD IS FINE, NO COMPLAINTS RAISED.	2016-06-24 00:00:29	1		0	CHILD IS FINE, NO COMPLAINTS RAISED.	2016-07-22 00:00:25	0	3	3	6	2016-05-10	2016-08-15	Completed
4011																				2016-05-11	2016-11-05	Withdraw Consent
4012	1		0	HOME VISIT DONE, CHILD IS FINE.	2016-06-13 00:00:26	1		0	CHILD IS FINE	2016-07-11 00:00:22	1		0	THE CHILD IS FINE, NO COMPLAITS RAISED	2016-08-08 00:00:18	3	3	3	9	2016-05-26	2016-08-31	Completed
4013	1		0	CHILD IS FINE, NO COMPLAINTS RAISED	2016-06-13 00:00:26	1		0	THE CHILD IS FINE, NO COMPLAITS RAISED.	2016-07-11 00:00:22	1		0	CHILD IS FINE, NO COMPLAITS RAISED. PILL PACK COLLECTED.	2016-08-12 00:00:55	3	3	3	9	2016-05-26	2016-09-05	Completed
4014	1		0	CHILD IS FINE, NO COMPLAITS RAISED.	2016-06-13 00:00:26	1		0	THE CHILD IS FINE, NO COMPLAINTS RAISED	2016-07-11 00:00:22	1		0	HOME VISIT DONE AND THE CHILD IS FINE.	2016-08-08 00:00:18	3	3	3	9	2016-05-26	2016-08-31	Completed
4015	1		0	THE CHILD IS FINE, NO COMPLAITS RAISED	2016-06-20 23:59:29	2	MOTHER DID NOT CAME FOR DRUG COLLECTION BECAUSE SHE TRAVELLED .		MOTHER DID NOT COME FOR DRUG COLLECTION	2016-07-17 23:59:48	2	PARTICIPANT DID NOT COME FOR DRUG COLLECTION		PARTICIPANT DID NOT COME FOR DRUG COLLECTION .CALLED THE MOTHER AND THE CHILD IS FINE	2016-08-15 23:59:21	3	0	0	3	2016-06-03	2016-09-15	Completed
4016	1		0		2016-07-05 00:00:32	1		0	BLISTER PACK COLLECTED, CHILD IS FINE	2016-08-02 00:00:28	1		0	THE CHILD IS FINE, NO COMPLAINTS RAISED. PILL PACK COLLECTED.	2016-08-30 00:00:24	3	3	3	9	2016-06-17	2016-09-22	Completed
4017	1		0		2016-07-05 00:00:32	2	MOTHER DID NOT COME TO COLLECT THE STUDY DRUGS.		BLISTER PACK NOT COLLECTED	2016-08-02 00:00:28	2	DID NOT COME TO COLLECT THE STUDY DRUGS		BLISTER PACK NOT COLLECTED	2016-08-30 00:00:24	3	0	0	3	2016-06-17	2016-09-23	Withdraw Consent
4018	1		0	CHILD IS FINE	2016-08-18 00:00:45	2	HOME VISIT DONE BY PHONE		PARTICIPANT DID NOT COME FOR DRUG COLLECTION VISIT DONE BY PHONE AND THE CHILD IS FINE.	2016-09-16 00:00:17	2	PARTICIPANT DID NOT COME FOR DRUG COLLECTION		PARTICIPANTS DID NOT COME DRUG COLLECTION.HOME VISIT DONE BY PHONE CHILD IS FINE.	2016-10-18 00:00:50	3	0	0	3	2016-08-01	2016-11-06	Completed
4019	1		0	CHILD IS FINE, NO COMPLAINTS RAISED. PILL PACK COLLECTED.	2016-09-11 23:59:40	2	MOTHER DID NOT COME TO COLLECT THE STUDY DRUGS		NO BLISTER PACK COLLECTED	2016-10-05 23:58:59	2	MOTHER DID NOT COME TO COLLECT THE STUDY DRUGS		BLISTER PACK NOT COLLECTED	2016-11-07 23:59:08	3	0	0	3	2016-08-26	2016-12-02	Completed
4020	1		0	THE CHILD IS FINE, NO COMPLAINTS RAISED.	2016-10-07 00:00:47	1		0	HOME VISIT DONE, CHILD IS FINE AND PILL PACK HAS BEEN COLLECTED.	2016-11-04 00:00:43	1		0	THE CHILD IS FINE, NO COMPLAINTS RAISED. PILL PACK COLLECTED	2016-12-02 00:00:38	3	3	3	9	2016-09-19	2016-12-26	Completed
4021	1		0	THE CHILD IS FINE, NO COMPLAINTS RAISED. PILL PACK COLLECTED.	2016-10-20 23:59:39	1		0	THE CHILD IS FINE, NO COMPLAINTS RAISED. PILL PACK COLLECTED	2016-11-17 23:59:35	1		0	THE CHILD IS FINE, NO COMPLAINTS RAISED. PILL PACK COLLECTED.	2016-12-15 23:59:31	3	3	3	9	2016-10-03	2017-01-09	Completed
4022	1		0	CHILD FINE	2016-11-11 23:59:45	1		0	CHILD IS FINE, NO COMPLAINTS RAISED..	2016-12-24 00:00:45	1		0	THE CHILD IS NOW FINE, HAD MALARIA ON 07/12/2016. HENCE HER HOME VISITS DATES WERE DIFFERED. PILL PACK COLLECTED.	2017-01-22 00:00:17	3	3	3	9	2016-10-26	2017-02-19	Completed
4023	1		0	HOME VISIT DONE, AND THE CHILD IS FINE.	2016-11-13 23:58:58	2	PARENTS DID NOT COME TO COLLECT THE STUDY DRUGS		BLISTER PACK NOT COLLECTED	2016-12-12 00:01:05	2	PARENTS DID NOT COME TO COLLECT THE STUDY DRUGS		BLISTER PACK NOT COLLECTED	2017-01-09 00:01:01	3	0	0	3	2016-10-27	2017-02-06	Completed
4024	1		0	THE CHILD IS FINE, NO COMPLAINTS RAISED, PILL PACK COLLECTED	2016-11-17 23:59:35	1		0	THE CHILD IS FINE, NO COMPLAINTS RAISED. PILL PACK COLLECTED.	2016-12-15 23:59:31	1		0	CHILD IS FINE, NO COMPLAINTS RAISED.	2017-01-12 23:59:27	3	3	3	9	2016-10-31	2017-02-06	Completed
4025	1		0	HOME VISIT DONE AND THE CHILD IS FINE, PILL PACK COLLECTED.	2016-11-24 23:59:01	1		0	CHILD IS FINE	2017-01-06 00:00:01	1		0	CHILD IS FINE, NO COMPLAINTS RAISED. PILL PACK COLLECTED.	2017-02-02 00:00:20	3	3	3	9	2016-11-07	2017-02-13	Completed
4026	1		0	CHILD IS FINE	2017-01-01 23:59:24	1		0	CHILD IS FINE, NO COMPLAINTS RAISED. BLISTER PACK COLLECTED.	2017-01-29 23:59:20	1		0	CHILD IS FINE, BLISTER PACK COLLECTED	2017-02-25 23:59:39	3	3	3	9	2016-12-14	2017-03-21	Completed
4027	1		0	THE CHILD IS FINE, NO COMPLAINTS RAISED. PILL PACK COLLECTED.	2017-01-10 00:00:37	1		0	THE CHILD IS FINE, BLISTER PACK COLLECTED.	2017-02-06 00:00:57	2	MOTHET NOT HOME		BLISTER PACK NOT COLLECTED BECAUSE MOTHER WAS NOT AT HOME	2017-03-07 00:00:29	3	3	0	6	2016-12-23	2017-03-30	Completed
4028	1		0	THE CHILD IS FINE, VOMITED THE FIRST DOSE. PILL PACK COLLECTED.	2017-01-11 00:00:14	1		0	CHILD IS FINE, NO COMPLAINTS RAISED. PILL PACK COLLECTED.	2017-02-08 00:00:10	1		0	CHILD IS FINE, NO COMPLAINTS RAISED	2017-03-09 23:59:19	3	3	3	9	2016-12-24	2017-03-30	Completed
4029	1		0	THE CHILD IS FINE, NO COMPLAITS RAISED. PILL PACK COLLECTED.	2017-01-22 00:00:17	1		0	CHILD IS FINEM NO COMPLAINTS RAISED, PILL PACK COLLECTED.	2017-02-19 23:59:49	2	MOTHER DID NOT COME TO COLLECT THE STUDY DRUGS		BLISTER PACK NOT COLLECTED	2017-03-19 00:00:09	3	3	0	6	2017-01-04	2017-04-11	Completed
4030	1		0	CHILD IS FINE	2017-02-08 23:59:46	1		0	THE CHILD IS FINE, NO COMPLAINTS RAISED.	2017-03-09 23:59:19	1		0	CHILD IS FINE, NO COMPLAINTS RAISED. BLISTER PACK COLLECTED.	2017-04-06 23:59:14	3	3	3	9	2017-01-23	2017-05-02	Completed
4031	1		0	CHILD IS FINE, NO COMPLAINTS RAISED.	2017-02-09 23:59:23	1		0	CHILD IS FINE AND BLISTER PACK COLLECTED	2017-03-09 23:59:19	1		0	CHILR IS FINE. BLISTER PACK COLLECTED	2017-04-06 23:59:14	3	3	3	9	2017-01-23	2017-05-02	Completed
4032																				2017-01-23	2017-01-23	Withdraw Consent
4033	1		0	CHILD IS FINE	2017-02-08 23:59:46	2	DID NOT COME TO COLLECT THE STUDY DRUGS.		BLISTER PACK NOT COLLECTED	2017-05-03 23:59:34	2	MOTHER DID NOT COME TO COLLECT THE STUDY DRUGS		HOME VISIT WAS NOT DONE	2017-05-03 23:59:34	3	0	0	3	2017-01-23	2017-05-08	Withdraw Consent
4034	1		0	CHILD NOT FINE HAS A COUGH .HE HAS GONE TO HOSPITAL.	2017-02-08 23:59:46	1		0	HOME VISIT DONE AND THE CHILD IS FINE. BLISTER PACK COLLECTED.	2017-03-09 23:59:19	2	MOTHER WAS NOT AT HOME		HOME VISIT DONE MOTHER NOT AT HOME BLISTER PACK NOT COLLECTED	2017-04-04 00:00:25	3	3	0	6	2017-01-23	2017-05-02	Completed
4035	1		0	CHILD IS FINE, NO COMPLAINTS RAISED. BLISTER PACK COLLECTED	2017-02-19 23:59:49	1		0	CHILD IS FINE	2017-03-19 23:59:45	1		0	THE CHILD IS FINE, NO COMPLAI TS RAISED, BLISTER PACK COLLECTED.	2017-04-16 00:00:05	3	3	3	9	2017-02-01	2017-05-09	Completed
4036	1		0	CHILD IS FINE, NO COMPLAINTS RAISED. BLISTER PACK COLLECTED.	2017-02-24 00:00:26	2	MOTHER WAS NOT AT HOME		BLISTER PACK NOT COLLECTED BECAUSE MOTHER WAS NOT AT HOME.	2017-03-24 23:59:58	1		0	CHILD IS FINE AND BLISTER PACK COLLECTED	2017-04-21 00:00:18	3	0	3	6	2017-02-06	2017-05-17	Completed
4037	1		0	CHILD IS FINE, NO COMPLAINTS RAISED. BLISTER PACK COLLECTED.	2017-02-24 00:00:26	1		0	CHILD IS FINE	2017-03-24 00:00:22	2	MOTHER DID NOT COME TO COLLECT THE STUDY DRUGS		NO BLISTER PACK COLLECTED	2017-04-21 00:00:18	3	3	0	6	2017-02-06	2017-05-15	Completed
4038	1		0	CHILD IS FINE, NO COMPLAINTS RAISED. BLISTER PACK COLLECTED	2017-02-25 23:59:39	1		0	THE CHILD IS FINE, NO COMPLAINTS RAISED. PILL PACK COLLECTED	2017-03-26 23:59:11	2	MOTHER DID NOT COMETO COLLECT THE DRUGS		HOME VISIT DONE	2017-04-22 23:59:31	3	3	0	6	2017-02-08	2017-05-24	Completed
4039	1		0	CHILD IS FINE AND BLISTER PACK COLLECTED	2017-03-06 00:00:53	2	MOTHER WAS NOT AT HOME		BLISTER PACK NOT COLLECTED	2017-04-03 00:00:49	1		0	CHILD IS FINE AND BLISTER PACK COLLECTED	2017-05-02 00:00:21	3	0	3	6	2017-02-16	2017-05-25	Completed
4040	1		0	HOME VISIT DONE AND THE CHILD IS FINE.	2017-03-13 00:00:19	1		0	HOME VISIT DONE THE CHILD IS FINE AND BLISTER PACK COLLECTED	2017-04-09 00:00:38	2	MOTHER WAS NOT HOME		BLISTER PACK NOT COLLECTED BECAUSE MOTHER WAS NOT AT HOME.	2017-05-08 00:00:11	3	3	0	6	2017-02-22	2017-05-30	Completed
4041	1		0	CHILD IS FINE	2017-03-13 23:59:55	1		0	CHILD IS FINE AND BLISTER PACK COLLECTED	2017-04-10 23:59:51	2	MOTHER DID NOT COME TO COLLECT THE DRUGS		HOME VISIT NOT DONE BECAUSE MOTHER DID NOT COME TO COLLECT THE STUDY DRUGS.	2017-05-08 23:59:47	3	3	0	6	2017-02-24	2017-06-01	Completed
4042	1		0	THE CHILD IS FINE, NO COMPLAINTS RAISED. BLISGER PACK COLLECTED.	2017-03-14 23:59:32	1		0	HOME VISIT DONE AND CHILD IS FINE. BLISTER PACK COLLECTED	2017-04-12 23:59:04	2	MOTHER DID NOT COME TO COLLECT THE STUDY DRUGS		HOME VISIT NOT DONE BECAUSE MOTHER DID NOT COME TO COLLECT THE STUDY DRUGS	2017-05-10 23:59:00	3	3	0	6	2017-02-25	2017-06-05	Completed
4043	1		0	CHILD IS FINE AND BLISTER PACK COLLECTED.	2017-03-17 00:00:56	1		0	CHILD IS FINE. BLISTER PACK COLLECTED	2017-04-14 00:00:52	1		0	CHILD IS FINE	2017-05-12 00:00:48	3	3	3	9	2017-02-27	2017-06-06	Completed
4044	1		0	CHILD IS FINE, NO COMPLAINTS RAISED. BLISTER PACK COLLECTED.	2017-03-18 00:00:32	1		0	THE CHILD IS FINE, BLISTER PACK COLLECTED	2017-04-15 00:00:28	1		0	CHILD IS FINE, NO COMPLAINTS RAISED	2017-05-12 00:00:48	3	3	3	9	2017-02-28	2017-06-05	Completed
4045	1		0	THE CHILD IS FINE, BLISTER PACK COLLECTED.	2017-03-24 00:00:22	1		0	CHILD IS FINE	2017-04-21 00:00:18	1		0	THE CHILD IS FINE AND BLISTER PACK COLLECTED	2017-05-19 00:00:14	3	3	3	9	2017-03-06	2017-06-11	Completed
4046	1		0	THE CHILD IS FINE	2017-02-26 23:59:15	1		0	CHILD IS FINE AND BLISTER PACK COLLECTED	2017-04-10 23:59:51	2	DRUG COLLECTION WAS NOT DONE		MOTHER DID NOT COME FOR DRUG COLLECTION	2017-06-05 00:00:07	3	3	0	6	2017-03-24	2017-07-10	Completed
4047	2	THE MOTHER OF THE PARTICIPANT NOT AT HOME		HOME VISIT DONE,THE CHILD IS FINE	2017-04-26 00:00:31	2	MOTHER DID NOT COME FOR DRUG COLLECTION		BLISTER PACK NOT COLLECTED	2017-05-24 00:00:27	2	MOTHER DID NOT COME TO COLLECT THE STUDY DRUGS		BLISTER PACK NOT COLLECTED	2017-06-21 00:00:23	0	0	0	0	2017-04-08	2017-07-20	Completed
4048	1		0	CHILD IS FINE, BLISTER PACK COLLECTED	2017-05-04 23:59:10	2	MOTHER DID NOT COME TO COLLECT THE STUDY DRUGS		NO BLISTER PACK WAS COLLECTED	2017-06-01 23:59:06	2	MOTHER DID NOT COME TO COLLECT THE STUDY DRUGS		HOME VISIT NOT DONE BECAUSE MOTHER DID NOT COME TO COLLECT THE STUDY DRUGS	2017-06-29 23:59:02	3	0	0	3	2017-04-18	2017-07-31	Completed
4049	1		0	CHILD IS FINE, BLISTER PACK COLLECTED	2017-05-08 00:00:11	1		0	CHILD IS FINE	2017-06-05 00:00:07	1		0	CHILD IE FINE, PILL PACK COLLECTED	2017-07-02 00:00:26	3	3	3	9	2017-04-20	2017-07-26	Completed
4050	2	MOTHER DID NOT GIVE THE CHILD THE STUDY DRUGS		MOTHER WAS ADVISED TO STILL GIVE THE CHILD THE STUDY DRUGS, AND WAS ALSO TOLD TO COME TO THE STUDY CLINIC ON 13 MAY 2017 TO TAKE THE STUDY DRUGS	2017-05-17 00:01:01											0	0	0	0	2017-04-29	2017-08-04	Completed
4051	1		0	CHILD IS FINE AND BLISTER PACK COLLECTED	2017-05-19 23:59:50	1		0	CHILD IS FINE, BLISTER PACK COLLECTED	2017-06-16 00:00:10	1		0	CHILD IS FINE	2017-07-14 00:00:06	3	3	3	9	2017-05-02	2017-08-07	Completed
4052	2	MOTHER MISPLACED THE STUDY DRUGS, HENCE NO BLISTER PACK WAS COLLECTED		NO BLISTER PACK COLLECTED	2017-06-05 23:59:43	1		0	CHILD IS FINE, BLISTER PACK COLLECTED	2017-07-03 00:00:03	2	MOTHER DID NOT COME TO COLLECT THE STUDY DRUGS		BLISTER PACK NOT COLLECTED	2017-07-31 23:59:35	0	3	0	3	2017-05-19	2017-09-19	Completed
4053	2	BLISTER PACK NOT COLLECTED BECAUSE MOTHER WAS NOT HOME		MOTHER WAS NOT AT HOME	2017-06-09 00:00:44	1		0	HOME VISIT DONE THE CHILD IS FINE	2017-07-07 00:00:39	1		0	BLISTER PACK COLLECTED	2017-08-04 00:00:35	0	3	3	6	2017-05-22	2017-08-27	Completed
4054	2	MOTHER WAS NOT AT HOME		BLISTER PACK NOT COLLECTED BECAUSE MOTHER WAS NOT AT HOME.	2017-06-16 00:00:10	1		0	CHILD IS FINE, 2 BLISTER PACK COLLECTED FOR WEEK 2 AND 6.	2017-07-14 00:00:06	1		0	CHILD IS FINE AND BLISTER PACK COLLECTED	2017-08-11 00:00:02	0	3	3	6	2017-05-29	2017-09-03	Completed
4055	1		0	CHILD IS FINE AND BLISTER PACK COLLECTED	2017-06-16 00:00:10	1		0	BLISTER PACK COLLECTED	2017-07-14 00:00:06	1		0	BLISTER PACK COLLECTED	2017-08-11 00:00:02	3	3	3	9	2017-05-29	2017-09-03	Completed
4056	1		0	CHILD IS FINE, BLISTER PACK COLLECTED.	2017-06-16 00:00:10	1		0	CHILD IS FINE, BLISTER PACK COLLECTED	2017-07-16 23:58:55	1		0	CHILD IS FINE AND BLISTER PACK COLLECTED	2017-08-14 00:01:02	3	3	3	9	2017-05-31	2017-09-07	Completed
4057	1		0	CHILD IS FINE, BLISTER PACK COLLECTED	2017-06-22 23:59:36	1		0	BLISTER PACK COLLECTED	2017-07-20 23:59:32	1		0	CHILD IS FINE	2017-08-16 23:59:51	3	3	3	9	2017-06-05	2017-09-11	Completed
4058	1		0	HOME VISIT DONE ,THE CHILD IS FINE	2017-06-27 00:00:13	1		0	CHILD IS FINE AND BLISTER PACK COLLECTED	2017-07-25 00:00:09	1		0	CHILD IS FINE	2017-08-22 00:00:05	3	3	3	9	2017-06-09	2017-09-14	Completed
4059	1		0	HOME VISIT DONE ,THE CHILD IS FINE	2017-06-29 23:59:02	1		0	CHILD IS FINE AND BLISTER PACK COLLECTED	2017-07-29 00:00:46	2	STUDY DRUGS WERE NOT COLLECTED.		BLISTER PACK NOT COLLECTED BECAUSE MOTHER DID NOT COME TO COLLECT THE STUDY DRUGS.	2017-08-25 00:01:05	3	3	0	6	2017-06-12	2017-09-18	Completed
4060	1		0	CHILD IS FINE AND BLISTER PACK COLLECTED	2017-07-20 23:59:32	1		0	CHILD IS FINE	2017-08-16 23:59:51	2	MOTHER DID NOT COME TO TAKE THE STUDY DRUGS		BLISTER PACK NOT COLLECTED BECAUSE MOTHER DID NOT COME TO COLLECT THE STUDY DRUGS	2017-09-14 23:59:24	3	3	0	6	2017-07-03	2017-10-09	Completed
4061	1		0	CHILD IS FINE, BLISTER PACK COLLECTED	2017-07-25 00:00:09	1		0	CHILD IS FINE AND BLISTER PACK COLLECTED	2017-08-22 00:00:05	1		0	CHILD IS FINE AND BLISTER PACK COLLECTED.	2017-09-19 00:00:01	3	3	3	9	2017-07-07	2017-10-12	Completed
4062	1		0	HOME VISIT DONE, BLISTER PACK COLLECTED	2017-07-30 23:59:58	2	MOTHER NOT AT HOME		MOTHER NOT AT HOME BLISTER PACK NOT COLLECTED	2017-08-28 23:59:31	2	MOTHER DID NOT COME TO COLLECT THE STUDY DRUGS.		BLISTER PACK NOT COLLECTED, BECAUSE MOTHER DID NOT COLLECT THE STUDY DRUGS	2017-09-24 23:59:50	3	0	0	3	2017-07-12	2017-10-24	Completed
4063	1		0	CHILD IS FINE	2017-08-14 00:01:02	1		0	CHILD IS FINE AND BLISTER PACK COLLECTED.	2017-09-11 00:00:58	2	MOTHER DID NOT COME TO COLLECT THE STUDY DRUGS		BLISTER PACK NOT COLLECTED BECAUSE MOTHER DID NOT COME TO COLLECT THE STUDY DRUGS.	2017-10-09 00:00:54	3	3	0	6	2017-07-27	2018-11-14	Withdraw Consent
4064	1		0	CHILD IS FINE AND BLISTER PACK COLLECTED	2017-09-18 00:00:24	1		0	CHILD IS FINE AND BLISTER PACK COLLECTED	2017-10-16 23:59:56	1		0	CHILD IS FINE AND BLISTER PACK COLLECTED	2017-11-13 00:00:16	3	3	3	9	2017-08-30	2017-12-05	Completed
4065	1		0	CHILD IS FINE, BLISTER PACK COLLECTED	2017-10-05 23:59:53	1		0	CHILD IS FINE AND BLISTER PACK COLLECTED	2017-11-02 23:59:49	1		0	CHILD IS FINE AND BLISTER PACK COLLECTED	2017-11-30 23:59:45	3	3	3	9	2017-09-19	2018-01-02	Completed
4066	1		0	BLISTER PACK COLLECTED AND CHILD IS FINE.	2018-03-06 23:59:12	1		0		2018-04-05 00:00:56	1		0	BLISTER PACK COLLECTED	2018-05-01 23:59:04	3	3	3	9	2018-02-17	2018-05-25	Completed
4067	1		0	CHILD IS FINE, BLISTER PACK COLLECTED.	2018-03-06 23:59:12	1		0		2018-04-05 00:00:56	2	MOTHER DID NOT COME TO COLLECT THE STUDY DRUGS		BLISTER PACK NOT COLLECTED	2018-05-01 23:59:04	3	3	0	6	2018-02-17	2018-05-25	Completed
4068	1		0	CHILD IS FINE AND BLISTER PACK COLLECTED	2018-03-09 00:00:36	1		0	CHILD IS FINE AND BLISTER PACK COLLECTED	2018-04-08 23:59:22	1		0	CHILD IS FINE AND BLISTER PACK COLLECTED	2018-05-06 23:59:18	3	3	3	9	2018-02-20	2018-05-28	Completed
4069	1		0	BLISTER PACK COLLECTED AND CHILD IS FINE	2018-03-21 00:00:16	1		0	CHILD IS FINE, AND BLISTER PACK COLLECTED	2018-04-18 00:00:12	1		0	CHILD IS FINE AND BLISTER PACK COLLECTED	2018-05-15 00:00:31	3	3	3	9	2018-03-03	2018-06-08	Completed
4070	1		0	CHILD IS FINE AND BLISTER PACK COLLECTED	2018-04-03 23:59:08	2	MOTHER DID NOT COME TO COLLECT THE STUDY DRUGS.		BLISTER PACK NOT COLLECTED	2018-05-01 23:59:04	2	MOTHER DID NOT COME TO COLLECT THE STUDY DRUGS		BLISTER PACK NOT COLLECTED	2018-06-01 00:00:24	3	0	0	3	2018-03-16	2018-06-28	Completed
4071	2	BLISTER PACK NOT COLLECTED		BLISTER PACK NOT COLLECTED BECAUSE THE EMPTY WAS THROWN AWAY	2018-04-18 00:00:12	1		0	CHILD IS FINE. TWO BLISTER PACKS COLLECTED.	2018-05-16 00:00:08	1		0	CHILD IS FINE AND 2 BLISTER PACK COLLECTED	2018-06-13 00:00:04	0	3	3	6	2018-03-31	2018-07-09	Completed
4072	1		0	THE CHILD IS FINE AND NO COMPLAINTS RAISED, BLISTER PACK COLLECTED	2018-04-18 00:00:12	1		0	CHILD IS FINE	2018-05-16 00:00:08	1		0	BLISTER PACK COLLECTED	2018-06-13 00:00:04	3	3	3	9	2018-03-31	2018-07-09	Completed
4073	1		0	CHILD IS FINE AND BLISTER PACK COLLECTED	2018-04-24 23:59:38	1		0	BLISTER PACK COLLECTED AND CHILD IS FINE	2018-05-22 23:59:34	2	MOTHER DID NOT COME TO THE STUDY CLINIC TO COLLECT THE STUDY DRUGS.		BLISTER PACK NOT COLLECTED, MOTHER DID NOT COLLECT THE STUDY DRUGS FROM THE STUDY CLINIC	2018-06-19 23:59:30	3	3	0	6	2018-04-07	2018-07-12	Completed
4074	1		0	BLISTER PACK COLLECTED AND CHILD IS FINE	2018-04-27 00:01:02	1		0	CHILD IS FINE AND BLISTER PACK COLLECTED	2018-05-23 23:59:10	1		0	CHILD IS FINE AND BLISTER PACK COLLECTED	2018-06-22 00:00:54	3	3	3	9	2018-04-09	2018-07-16	Completed
4075	2	MOTHER WAS NOT AT HOME		MOTHER WAS NOT AT HOME, HENCE BLISTER PACK NOT COLLECTED	2018-04-27 00:01:02	2	MOTHER DID NOT COME TO COLLECT THE STUDY DRUGS		BLISTER PACK NOT COLLECTED	2018-05-23 23:59:10	2	MOTHER DID NOT COME TO THE STUDY CLINIC TO COLLECT THE STUDY DRUGS		BLISTER PACK NOT COLLECTED	2018-06-22 00:00:54	0	0	0	0	2018-04-09	2018-07-22	Completed
4076	2	MOTHER MISPLACED THE BLISTER PACK, HENCE BLISTER PACK NOT COLLECTED		BLISTER PACK NOT COLLECTED	2018-05-12 23:59:07	2	MOTHER MISPLACED THE BLISTER PACK.		BLISTER PACK NOT COLLECTED BECAUSE MOTHER MISPLACED THE BLISTER PACK PACK.	2018-06-11 00:00:51	1		0	CHILD IS FINE AND BLISTER PACK COLLECTED.	2018-07-09 00:00:47	0	0	3	3	2018-04-25	2018-08-01	Completed
4077	1		0	CHILD IS FINE, AND BLISTER PACK COLLECTED	2018-06-12 00:00:27	1		0	CHILD IS FINE AND BLISTER PACK COLLECTED. DATES WERE CHANGED BECAUSE THE CHILD HAD MALARIA.	2018-07-23 23:59:15	1		0	CHILD IS FINE AND BLISTER PACK COLLECTED	2018-08-18 23:59:58	3	3	3	9	2018-05-25	2018-09-11	Completed
4078	1		0	CHILD IS FINE AND BLISTER PACK COLLECTED	2018-07-05 23:59:46	1		0	CHILD IS FINE AND BLISTER PACK COLLECTED	2018-08-02 23:59:42	1		0	BLISTER PACK COLLECTED AND CHILD IS FINE	2018-08-30 23:59:38	3	3	3	9	2018-06-19	2018-09-27	Completed
5001	1		0		2016-04-14 23:59:34	1		0		2016-05-12 23:59:30	1		0	CHILD IS FINE NO COMPLAINTS RAISED	2016-06-10 23:59:02	3	3	3	9	2016-03-29	2016-07-05	Completed
5002	1		0		2016-04-18 00:00:34	1		0		2016-05-16 00:00:30	1		0	CHILD IS FINE	2016-06-12 00:00:50	3	3	3	9	2016-03-30	2016-07-06	Completed
5003	1		0		2016-05-06 23:59:40	1		0	CHILD IS FINE AND BLISTER PACK COLLECTED	2016-06-06 00:01:00	1		0	CHILD IS FINE AND BLISTER PACK COLLECTED	2016-07-01 23:59:32	3	3	3	9	2016-04-20	2016-07-27	Completed
5004	1		0	THE CHILD IS FINE, DID NOT VOMIT THE DRUGS.	2016-05-29 23:59:23	1		0	CHILD IS FINE, NO COMPLAINTS RAISED.	2016-06-26 23:59:19	1		0	HOME VISIT DONEM CHILD IS FINE	2016-07-24 23:59:14	3	3	3	9	2016-05-12	2016-08-14	Completed
5005	1		0	THE CHILD IS FINE AND TOOK THE STUDY DRUGS WITHOUT ANY PROBLEM	2016-06-03	1		0		2016-07-01 23:59:32	1		0	CHILD IS FINE, NO COMPLAINTS RAISED	2016-07-28 23:59:51	3	3	3	9	2016-05-17	2016-08-25	Completed
5006	1		0	THE CHILD IS FINE, TOOK THE DRUGS WITHOUT ANY PROBLEM.	2016-06-03	1		0	CHILD IS FINE	2016-06-30 23:59:55	1		0	HOME VISIT DONE	2016-07-28 23:59:51	3	3	3	9	2016-05-17	2016-08-23	Completed
5007	1		0	CHILD IS FINE AND BLISTER PACK COLLECTED	2016-06-03 23:59:36	1		0	CHILD IS FINE AND BLISTER PACK COLLECTED	2016-06-25 00:00:06	1		0	BLISTER PACK COLLECTED	2016-07-24 23:59:14	3	3	3	9	2016-05-18	2016-09-09	Completed
5008	1		0	THE CHILD IS FINE, NO COMPLAINTS RAISED.	2016-06-26 23:59:19	1		0	CHILD IS FINE NO COMPLAINT RAISED	2016-07-26 00:01:02	1		0	THE CHILD IS FINE, NO COMPLAITS RAISED. PILL PACK COLLECTED.	2016-08-21 23:59:10	3	3	3	9	2016-06-10	2016-09-16	Completed
5009	1		0	THE CHILD IS FINE, NO COMPLAINTS RAISED	2016-08-08 00:00:18	2	The mother was not at home and she did not leave the blister pack with anyone.		FOUND THE CHILD WAS FINE.	2016-09-05 00:00:14	1		0	THE CHILD IS FINEM NO COMPLAITS RAISED. PILL PACK COLLECTED.	2016-10-03 00:00:10	3	0	3	6	2016-07-21	2016-10-26	Completed
5010	1		0	CHILD IS FINE	2016-08-08 23:59:54	1		0	THE CHILD IS FINE.	2016-09-05 00:00:14	1		0	THE CHILD IS FINE, PILL PACK COLLECTED.	2016-10-03 00:00:10	3	3	3	9	2016-07-22	2016-10-26	Completed
5011	1		0	CHILD IS FINE AND NO COMPLAINTS RAISED. PILL PACK COLLECTED	2016-08-19 00:00:21	1		0	THE CHILD IS FINE, NO COMPLAINTS RAISED. PILL PACK COLLECTED	2016-09-16 00:00:17	2	PARTICIPANT DID NOT COME FOR DRUG COLLECTION		PARTICIPANT DID NOT NOT COME FOR DTUG COLLECTION. HOME VISIT DONE BY PHONE CHILD IS FINE	2016-10-18 00:00:50	3	3	0	6	2016-08-01	2016-11-07	Completed
5012	1		0	CHILD IS FINE, NO COMPLAINTS RAISED. PILL PACK COLLECTED	2016-09-11 23:59:40	1		0	CHILD IS FINE, NO COMPLAINT RAISED AND PILL PACK COLLECTED.	2016-10-09 23:59:36	1		0	THE CHILD IS FINE, NO COMPLAINTS RAISED. PILL PACK COLLECTED.	2016-11-06 23:59:32	3	3	3	9	2016-08-25	2016-12-01	Completed
5013	2	MOTHER LOST THE BLISTER PACK		CHILD TOOK THE DRUGS BUT MOTHER LOST THE BLISTER PACK.	2016-10-14 00:00:13	1		0	THE CHILD IS FINE, NO COMPLAINTS RAISED. PILL PACK COLLECTED.	2016-11-11 00:00:09	1		0	CHILD IS FINE, NO COMPLAINTS RAISED, PILL PACK COLLECTED.	2016-12-09 00:00:05	0	3	3	6	2016-09-26	2017-01-02	Completed
5014	1		0	CHILD IS FINE	2016-11-11 23:59:45	1		0	THE CHILD IS FINE.	2016-12-09 00:00:05	1		0	THE CHILD IS FINE, NO COMPLAINTS RAISED. PILL PACK COLLECTED.	2017-01-21 00:00:40	3	3	3	9	2016-10-26	2017-01-30	Death
5015	2	MOTHER NOT AT HOME		HOME VISIT DONE MOTHER NOT AT HOME	2016-11-18 23:59:11	2	HOME VISIT NOT DONE		DRUG COLLECTION NOT DONE	2016-12-16 23:59:07	2	MOTHER DID NOT COME FOR DRUG COLLECTION		MOTHER DID NOT COME FOR DRUG COLLECTION, HENCE NO BLISTER PACK COLLECTED.	2017-01-16 00:00:27	0	0	0	0	2016-11-02	2017-02-08	Completed
5016	1		0	THE CHILD IS FINE, NO COMPLAITS RAISED. PILL PACK COLLECTED	2016-12-03 23:59:51	1		0	MOTHER MISPLACED THE BLISTER PACK AFTER THE CHILD HAD TAKEN THE DRUGS	2017-01-02 23:59:00	2	MOTHER DID NOT COME TO COLLECT THE STUDY DRUGS.		HOME VISIT NOT DONE, MOTHER DID NOT COME TO COLLECT STUDY DRUGS.	2017-05-03 23:59:34	3	3	0	6	2016-11-16	2017-02-21	Completed
5017																				2016-11-30	2016-11-30	Withdraw Consent
5018	1		0	THE CHILD IS FINE, NO COMPLAINTS RAISED. BLISTER PACK COLLECTED.	2016-12-22 23:58:57	2	DID NOT COME FOR DRUG COLLECTION		BLISTER NOT COLLECTED	2017-01-20 00:01:04	2	MOTHER DID NOT COME TO COLLECT THE STUDY DRUGS		BLISTER PACK NOT COLLECTED	2017-02-17 00:01:00	3	0	0	3	2016-12-05	2017-03-13	Completed
5019	1		0	CHILD IS FINE	2017-01-02 23:59:00	1		0	CHILD IS FINE, NO COMPLAINTS RAISED AND PILL PACK COLLECTED	2017-01-29 23:59:20	2	DID NOT COME TO COLLECT THE STUDY DRUGS.		BLISTER PACK NOT COLLECTED, BECAUSE MOTHER DID NOT COME TO COLLECT THE STUDY DRUGS.	2017-02-28 00:01:03	3	3	0	6	2016-12-16	2017-03-26	Completed
5020	2	THE EMPTY BLISTER PACK GOT LOST		THE CHILD IS FINE, TOOK THE DRUGS BUT THE EMPTY PILL PACK WAS MISPLACED BY THE CHILD	2017-01-12 23:59:27	1		0	THE CHILD IS FINE, NO COMPLAINTS RAISED.	2017-02-12 00:00:47	1		0	THE CHILD IS FINE, NO COMPLAINTS RAISED.	2017-03-09 23:59:19	0	3	3	6	2016-12-26	2017-03-30	Completed
5021	1		0	THD CHILD IS FINE. THE MOTHER GAVE THE CHILD ONLY ONE TABLET FROM THE BLISTER PACK. THE BLISTER PACK HAS BEEN COLLECTED. NO COMPLAINTS RAISED.	2017-01-15 00:00:51	1		0	CHILD IS FINE, NO COMPLAINTS RAISED	2017-02-13 00:00:23	1		0	THE CHILD IS FINE, NO COMPLAINTS RAISED. BLISTER PACK COLLECTED.	2017-03-13 00:00:19	3	3	3	9	2016-12-28	2017-04-05	Completed
5022	1		0	HOME VISIT DONE	2017-01-17 23:59:40	1		0	CHILD IS FINE, NO COMPLAINTS RAISED.	2017-02-14 23:59:36	1		0	CHILD IS FINE	2017-03-14 23:59:32	3	3	3	9	2016-12-31	2017-04-06	Completed
5023	1		0	BLISTER PACK COLLECTED AND CHILD IS FINE	2017-01-20 00:01:04	2	MOTHER DID NOT COME FOR DRUG COLLECTION		MOTHER DID NOT COME FOR DRUG COLLECTION	2017-02-14 23:59:36	2	MOTHER DID NOT COME FOR DRUG COLLECTION		MOTHER DID NOT COME FOR DRUG COLLECTION	2017-03-14 23:59:32	3	0	0	3	2016-12-31	2017-04-08	Completed
5024	1		0	CHILD IS FINE, NO COMPLAINTS RAISED. BLISTER PACK COLLECTED.	2017-01-20 00:01:04	1		0	CHILD IS FINE, NO COMPLAINTS RAISED, BLISTER PACK COLLECTED.	2017-02-17 00:01:00	2	MOTHER DID NOT COME TO COLLECT THE DRUGS		HOME VISIT NOT DONE.	2017-03-17 00:00:56	3	3	0	6	2017-01-02	2017-04-16	Completed
5025	1		0	BLISTER PACK COLLECTED AND THE CHILD IS FINE.	2017-02-01 00:00:44	2	DID NOT COME TO COLLECT THE STUDY DRUGS		HOME VISIT NOT DONE	2017-03-01 00:00:39	2	MOTHER DID NOT COME TO COLLECT THE STUDY DRUGS.		HOME VISIT NOT DONE	2017-03-29 00:00:35	3	0	0	3	2017-01-14	2017-04-21	Completed
5026	2	MOTHER WAS NOT HOME		BLISTER PACK NOT COLLECTED BECAUSE MOTHER WAS NOT HOME	2017-02-02 23:59:56	1		0	THE CHILD IS FINE, NO CMPLAINTS RAISED. BLISTER PACK COLLECTED	2017-03-02 00:00:16	1		0	CHILD IS FINE, NO COMPLAINTS RAISED. BLISTER PACK COLLECTED,	2017-03-30 23:59:48	0	3	3	6	2017-01-16	2017-04-23	Completed
5027	1		0	CHILD IS FINE, NO COMPLAINTS RAISED. PILL PACK COLLECTED.	2017-02-02 23:59:56	1		0	THE CHILD IS FINE, NO COMPLAINTS RAISED. BLISTER PACK COLLECTED.	2017-03-02 00:00:16	1		0	THE CHILD IS FINE, BLISTER PACK COLLECTED.	2017-03-30 23:59:48	3	3	3	9	2017-01-16	2017-04-23	Completed
5028	1		0	CHILD IS FINE	2017-02-08 23:59:46	1		0	CHILD IS FINE	2017-03-08 23:59:42	1		0	CHILD IS FINE, NO COMPLAINTS RAISED. BLISTER PACK COLLECTED	2017-04-06 23:59:14	3	3	3	9	2017-01-23	2017-05-02	Completed
5029	1		0	CHILD IS FINE AND BLISTER PACK COLLECTED	2017-02-19 00:00:13	2	DID NOT COME TO COLLECT THE STUDY DRUGS		BLISTER PACK NOT COLLECTED	2017-03-19 00:00:09	2	DID NOT COME TO COLLECT THE STUDY DRUGS		NO BLISTER PACK COLLECTED	2017-04-16 00:00:05	3	0	0	3	2017-02-01	2017-05-18	Completed
5030	1		0	CHILD IS FINE AND BLISTER PACK COLLECTED	2017-03-08 23:59:42	1		0	HOME VISIT DONE AND THE CHILD IS FINE. BLISTER PACK COLLECTED.	2017-04-04 00:00:25	1		0	CHILD IS FINE, BLISTER PACK COLLECTED	2017-05-02 00:00:21	3	3	3	9	2017-02-17	2017-05-25	Completed
5031	1		0	THE CHILD IS FINE, NO COMPLAINTS RAISED. BLISTER PACK COLLECTED.	2017-03-13 00:00:19	1		0	HOME VISIT DONE THE CHILD IS FINE AND BLISTER PACK COLLECTED	2017-04-09 00:00:38	1		0	BLISTER PACK COLLECTED	2017-05-08 00:00:11	3	3	3	9	2017-02-22	2017-05-31	Completed
5032	1		0	CHILD IS FINE	2017-03-13 23:59:55	2	MOTHER NOT AT HOME		BLISTER PACK NOT COLLECTED BECAUSE MOTHER WAS AT HOME	2017-04-10 23:59:51	2	MOTHER WAS NOT AT HOME		BLISTER PACK NOT COLLECTED, BECAUSE MOTHER HAD GONE TO MPONDABWINO MARKET TO SELL TOMATO.	2017-05-08 23:59:47	3	0	0	3	2017-02-24	2017-06-01	Completed
5033	1		0	CHILD IS FINE. NO COMPLAINTS RAISED	2017-03-17 00:00:56	1		0	CHILD IS FINE AND BLISTER PACK COLLECTED	2017-04-10 23:59:51	2	MOTHER DID NOT COME TO COLLECT THE STUDY DRUGS		BLISTER PACK NOT COLLECTED	2017-05-12 00:00:48	3	3	0	6	2017-02-27	2017-06-12	Completed
5034	1		0	HOME VISIT DONE AND THE CHILD IS FINE.	2017-03-24 23:59:58	1		0	CHILD IS FINE NO COMPLAINTS RAISED.	2017-04-21 00:00:18	1		0	CHILD IS FINE, BLISTER PACK COLLECTED	2017-05-19 00:00:14	3	3	3	9	2017-03-07	2017-06-12	Completed
5035	1		0	THE CHILD IS FINE, NO COMPLAINTS RAISED. BLISTER PACK COLLECTED.	2017-03-28 00:00:59	1		0	HOME VISIT DONE,THE CHILD IS FINE AND BLISTER PACK IS COLLECTED	2017-04-26 00:00:31	1		0	CHILD IS FINE AND BLISTER PACK COLLECTED	2017-05-23 00:00:51	3	3	3	9	2017-03-10	2017-06-16	Completed
5036	1		0	THE CHILD IS FINE. BLISTER PACK COLLECTED	2017-04-03 00:00:49	1		0	CHILD IS FINE	2017-05-02 00:00:21	1		0	THE CHILD IS FINE	2017-05-29 00:00:40	3	3	3	9	2017-03-16	2017-06-22	Completed
5037	1		0	CHILD IS FINE	2017-05-09 23:59:24	2	MOTHER DID NOT COME FOR DRUG COLLECTION		BLISTER PACK NOT COLLECTED	2017-06-06 23:59:20	2	MOTHER DID NOT COME FOR DRUG COLLECTION		BLISTER PACK NOT COLLECTED	2017-07-04 23:59:15	3	0	0	3	2017-04-22	2017-08-04	Completed
5038	1		0	CHILD IS FINE, BLISTER PACK COLLECTED	2017-05-15 23:59:13	1		0	CHILD IS FINE AND BLISTER COLLECTED	2017-06-10 00:00:20	1		0	BLISTER PACK COLLECTED AND CHILD IS FINE	2017-07-09 23:59:29	3	3	3	9	2017-04-27	2017-08-03	Completed
5039	1		0	BLISTER PACK COLLECTED	2017-05-25 23:59:40	1		0	CHILD IS FINE, BLISTER PACK COLLECTED	2017-06-22 23:59:36	1		0	CHILD IS FINE, BLISTER PACK COLLECTED	2017-07-20 23:59:32	3	3	3	9	2017-05-08	2017-08-14	Completed
5040	1		0	CHILD IS FINE AND BLISTER PACK COLLECTED	2017-06-05 23:59:43	1		0	HOME VISIT DONE THE CHILD IS FINE	2017-07-03 23:59:39	1		0	HOME VISIT DONE AND BLISTER PACK COLLECTED	2017-07-31 23:59:35	3	3	3	9	2017-05-19	2017-08-25	Completed
5041	1		0	CHILD IS FINE AND BLISTER PACK COLLECTED	2017-06-06 23:59:20	2	DRUG COLLECTION NOT DONE		FATHER COME TO COLLECT STUDY DRUG LATE	2017-07-04 23:59:15	1		0	CHILD IS FINE, BLISTER PACK COLLECTED	2017-08-11 00:00:02	3	0	3	6	2017-05-20	2017-09-04	Completed
5042	1		0	CHILD IS FINE AND BLISTER PACK COLLECTED	2017-06-16 23:59:46	1		0	CHILD IS FINE	2017-07-14 23:59:42	1		0	BLISTER PACK COLLECTED	2017-08-11 00:00:02	3	3	3	9	2017-05-30	2017-09-04	Completed
5043	1		0	BLISTER PACK COLLECTED	2017-06-18 23:58:59	2	HOME VISIT NOT DONE		MOTHER DID NOT COME FOR DRUG COLLECTION	2017-07-16 23:58:55	2	HOME VISIT NOT DONE		MOTHER DID NOT COME FOR DRUG COLLECTION.	2017-08-12 23:59:14	3	0	0	3	2017-05-31	2017-09-13	Completed
5044	1		0	CHILD IS FINE AND BLISTER PACK COLLECTED	2017-06-27 00:00:13	1		0	CHILD IS FINE	2017-07-23 00:00:56	1		0	CHILD IS FINE	2017-08-21 00:00:28	3	3	3	9	2017-06-07	2017-09-13	Completed
5045	1		0	HOME VISIT DONE THE CHILD IS FINE	2017-06-29 23:59:02	1		0	CHILD IS FINE AND BLISTER PACK COLLECTED.	2017-08-15 00:00:38	1		0	CHILD IS FINE AND BLISTER PACK COLLECTED	2017-09-25 23:59:27	3	3	3	9	2017-06-12	2017-10-20	Completed
5046	1		0	CHILD IS FINE AND BLISTER PACK COLLECTED	2017-06-29 23:59:02	1		0	CHILD IS FINE AND BLISTER PACK COLLECTED	2017-07-27 23:58:58	1		0	CHILD IS FINE	2017-08-25 00:01:05	3	3	3	9	2017-06-12	2017-09-11	Completed
5047	1		0	BLISTER PACK COLLECTED	2017-07-03 00:00:03	1		0	BLISTER PACK COLLECTED	2017-07-30 23:59:58	1		0	CHILD IS FINE	2017-08-28 23:59:31	3	3	3	9	2017-06-14	2017-09-19	Completed
5048	1		0	CHILD IS FINE, BLISTER PACK COLLECTED	2017-07-03 00:00:03	1		0	CHILD IS FINE AND BLISTER PACK COLLECTED	2017-07-31 23:59:35	1		0	CHILD IS FINE	2017-08-28 23:59:31	3	3	3	9	2017-06-15	2017-09-20	Completed
5049	2	MOTHER DID NOT COME TO COLLECT THE STUDY DRUGS		BLISTER PACK NOT COLLECTED BECAUSE MOTHER DID NOT COME TO COLLECT THE STUDY DRUGS	2017-07-03 23:59:39	1		0	BLISTER PACK COLLECTED	2017-07-30 23:59:58	2	MOTHER DID NOT COME TO COLLECT THE STUDY DRUGS		BLISTER PACK NOT COLLECTED	2017-08-28 23:59:31	0	3	0	3	2017-06-16	2017-09-18	Completed
5050	2	MOTHER WAS NOT AT HOME		BLISTER PACK NOT COLLECTED BECAUSE MOTHER WAS NOT AT HOME	2017-07-10 23:59:05	2	MOTHER DID NOT COME TO COLLECT THE STUDY DRUGS		BLISTER PACK NOT COLLECTED BECAUSE MOTHER DID NOT COME TO THE STUDY CLINIC TO COLLECT THE STUDY DRUGS.	2017-08-07 23:59:01						0	0	0	0	2017-06-23	2017-06-23	Withdraw Consent
5051	1		0	BLISTER PACK COLLECTED	2017-07-30 23:59:58	1		0	CHILD IS FINE	2017-08-28 23:59:31	1		0	CHILD IS FINE AND BLISTER PACK COLLECTED	2017-09-29 00:00:27	3	3	3	9	2017-07-13	2017-10-18	Completed
5052	1		0	BLISTER PACK COLLECTED	2017-08-11 00:00:02	2	MOTHER DID NOT COME TO COLLECT THE STUDY DRUGS.		BLISTER PACK NOT COLLECTED BECAUSE MOTHER DID NOT COME TO COLLECT THE STUDY DRUGS.	2017-09-07 23:59:57	2	MOTHER DID NOT COLLECT THE STUDY DRUGS		BLISTER PACK NOT COLLECTED	2017-10-05 23:59:53	3	0	0	3	2017-07-24	2017-11-06	Completed
5053	1		0	CHILD IS FINE AND BLISTER PACK COLLECTED	2017-08-17 23:59:28	1		0	CHILD IS FINE	2017-09-13 23:59:47	1		0	CHILD IS FINE AND BLISTER PACK COLLECTED	2017-10-12 23:59:20	3	3	3	9	2017-07-31	2017-11-08	Completed
5054	1		0	CHILD IS FINE	2017-09-12 00:00:34	1		0	CHILD IS FINE. BLISTER PACK COLLECTED	2017-10-10 00:00:30	1		0	CHILD IS FINE	2017-11-07 00:00:26	3	3	3	9	2017-08-25	2017-11-30	Completed
5055	1		0	CHILD IS FINE AND BLISTER PACK COLLECTED	2017-10-31 00:01:00	1		0	CHILD IS FINE AND BLISTER PACK COLLECTED	2017-11-28 00:00:56	2	COMREC HAS NOT YET APPROVED THE PMC STUDY RENEWAL		BLISTER NOT COLLECTED	2017-12-27 00:00:28	3	3	0	6	2017-10-13	2018-01-19	Completed
5056	1		0	CHILD IS FINE	2017-11-13 23:59:52	2	MOTHER DID NOT COME TO COLLECT THE STUDY DRUGS		BLISTER PACK NOT COLLECTED	2017-12-11 00:00:12	2	MOTHER DID NOT COME TO COLLECT THE STUDY DRUGS		BLISTER PACK NOT COLLECTED	2018-01-07 00:00:31	3	0	0	3	2017-10-25	2018-02-07	Withdraw Consent
5057	1		0	CHILD IS FINE AND BLISTER PACK COLLECTED	2018-03-11 23:59:26	1		0	CHILD IS FINE AND BLISTER PACK COLLECTED	2018-04-08 23:59:22	2	GUARDIAN DID NOT COME TO COLLECT THE STUDY DRUGS		BLISTER PACK NOT COLLECTED BECAUSE MOTHER DID NOT COME TO COLLECT THE STUDY DRUGS	2018-05-06 23:59:18	3	3	0	6	2018-02-21	2018-06-01	Completed
5058	1		0	BLISTER PACK COLLECTED AND BLISTER PACK COLLECTED	2018-03-11 23:59:26	1		0	CHILD IS FINE AND BLISTER PACK COLLECTED	2018-04-08 23:59:22	1		0		2018-05-06 23:59:18	3	3	3	9	2018-02-21	2018-05-29	Completed
5059	2	MOTHER MISPLACED THE EMPTY BLISTER PACK		HOME VISIT DONE BUT THE BLISTER PACK WAS NOT COLLECTED BECAUSE IT WAS MISPLACED AFTER THE CHILD HAD TAKEN THE STUDY DRUGS.	2018-03-16 00:00:03	1		0	CHILD IS FINE AND BLISTER PACK COLLECTED	2018-04-12 00:00:22	1		0	BLISTER PACK COLLECTED AND CHILD IS FINE	2018-05-10 00:00:18	0	3	3	6	2018-02-25	2018-06-03	Completed
5060	1		0	CHILD IS FINE.	2018-04-03 23:59:08											3	0	0	3	2018-03-16	2018-04-08	Death
5061	1		1	CHILD IS FINE AND BLISTER PACK COLLECTED	2018-04-06 00:00:32	1		0	CHILD IS FINE AND BLISTER PACK COLLECTED	2018-05-04 00:00:28	2	MOTHER WAS NOT AT HOME, HENCE NO BLISTER PACK COLLECTED		BLISTER PACK NOT COLLECTED	2018-06-01 00:00:24	2	3	0	5	2018-03-19	2018-06-24	Completed
5062	1		0	CHILD IS FINE AND BLISTER PACK COLLECTED	2018-04-08 23:59:22	1		0		2018-05-08 00:01:05	1		0	CHILD IS FINE AND BLISTER PACK COLLECTED	2018-06-05 00:01:01	3	3	3	9	2018-03-23	2018-06-29	Completed
5063	1		0	CHILD IS FINE AND BLISTER PACK COLLECTED	2018-04-12 23:59:58	1		0	BLISTER PACK COLLECTED AND CHILD IS FINE	2018-05-10 23:59:54	2	MOTHER WAS NOT AT HOME		BLISTER PACK NOT COLLECTED BECAUSE MOTHER WAS NOT AT HOME	2018-06-07 23:59:50	3	3	0	6	2018-03-26	2018-07-01	Completed
5064	1		0	CHILD IS FINE AND BLISTER PACK COLLECTED	2018-04-18 00:00:12	2	MOTHER NOT AT HOME		MOTHER NOT AT HOME SHE JUST LEFT CHILD HEALTH PASSPORT BOOK. BLISTER PACK NOT COLLECTED.	2018-05-16 00:00:08	1		0	COLLECTED 2 BLISTER PACKS.	2018-06-13 00:00:04	3	0	3	6	2018-03-31	2018-07-05	Completed
5065	2	MOTHER MISPLACED THE EMPTY BLISTER PACK		BLISTER PACK NOT COLLECTED BECAUSE MOTHER MISPLACED THE EMPTY BLISTER PACK.	2018-05-06 23:59:18	1		0	CHILD IS FINE AND BLISTER PACK COLLECTED	2018-06-03 23:59:13	2	MOTHER DID NOT COME TO COLLECT THE STUDY DRUGS, HENCE NO BLISTER PACK COLLECTED		BLISTER PACK NOT COLLECTED	2018-07-01 23:59:09	0	3	0	3	2018-04-19	2018-07-26	Completed
5066	2	MOTHER WAS NOT AT HOME		BLISTER PACK WAS NOT COLLECTED BECAUSE MOTHER WAS NOT AT HOME	2018-05-10 23:59:54	1		0	CHILD IS FINE AND BLISTER PACK COLLECTED	2018-06-07 23:59:50	2	MOTHER WAS NOT AT HOME HENCE NO BLISTER PACK COLLECTED.		NO BLISTER PACK COLLECTED	2018-07-05 00:00:10	0	3	0	3	2018-04-23	2018-07-29	Completed
5067	1		0	CHILD IS FINE AND BLISTER PACK COLLECTED	2018-05-10 23:59:54	1		0	CHILD IS FINE, BLISTER PACK COLLECTED	2018-06-07 23:59:50	1		0	CHILD IS FINE AND BLISTER COLLECTED	2018-07-05 00:00:10	3	3	3	9	2018-04-23	2018-07-29	Completed
5068	1		0	CHILD IS FINE AND BLISTER PACK COLLECTED	2018-05-10 23:59:54	1		0	BLISTER PACK COLLECTED AND CHILD IS FINE.	2018-06-07 23:59:50	2	MOTHER DID NOT COME TO COLLECT THE STUDY DRUGS		NO BLISTER PACK COLLECTED.	2018-07-05 00:00:10	3	3	0	6	2018-04-23	2018-07-29	Completed
5069	2	MOTHER NOT AT HOME		BLISTER PACK NOT COLLECTED	2018-05-15 00:00:31	1		0	BLISTER PACK COLLECTED	2018-06-11 00:00:51	1		0	CHILD IS FINE AND BLISTER PACK COLLECTED	2018-07-09 00:00:47	0	3	3	6	2018-04-26	2018-08-02	Completed
5070	1		0	BLISTER PACK COLLECTED	2018-05-21 00:00:21	2	MOTHER WAS NOT AT HOME WHEN THE STUDY STAFF VISITED HER.		BLISTER PACK NOT COLLECTED, MOTHER WAS NOT AT HOME.	2018-06-18 00:00:17	1		0	CHILD IS FINE AND BLISTER PACK COLLECTED	2018-07-16 00:00:13	3	0	3	6	2018-05-03	2018-08-08	Completed
5071	1		0	CHILD IS FINE AND BLISTER PACK COLLECTED	2018-06-12 00:00:27	1		0	CHILD IS FINE AND BLISTER PACK COLLECTED	2018-07-10 00:00:23	1		0	CHILD IS FINE	2018-08-07 00:00:19	3	3	3	9	2018-05-25	2018-08-30	Completed
5072	1		1	CHILD IS FINE AND BLISTER PACK COLLECTED	2018-06-13 00:00:04	1		1	BLISTER PACK COLLECTED AND CHILD IS FINE	2018-07-11	1		0	CHILD IS FINE	2018-08-07 23:59:55	2	2	3	7	2018-05-26	2018-08-30	Completed
5073	1		0	CHILD IS FINE AND BLISTER PACK COLLECTED	2018-06-19 23:59:30	1		0	BLISTER PACK COLLECTED AND CHILD IS FINE	2018-07-16 00:00:13	1		0	CHILD IS FINE AND BLISTER PACK COLLECTED	2018-08-13 00:00:09	3	3	3	9	2018-05-31	2018-09-05	Completed
5074	1		0	BLISTER PACK COLLECTED AND CHILD IS FINE	2018-06-22 00:00:54	1		0	BLISTER PACK COLLECTED AND CHILD IS FINE	2018-07-20 00:00:50	1		0	CHILD IS FINE AND BLISTER PACK COLLECTED	2018-08-18 00:00:22	3	3	3	9	2018-06-05	2018-09-10	Completed
5075	1		0	THE CHILD IS FINE AND BLISTER PACK COLLECTED	2018-07-05 23:59:46	1		0	BLISTER PACK COLLECTED AND CHILD IS FINE	2018-08-02 23:59:42	1		0	CHILD IS FINE AND BLISTER PACK COLLECTED	2018-08-30 23:59:38	3	3	3	9	2018-06-19	2018-09-26	Completed

## Sheet: Dictionary
Variable name	Meaning	Code	Analysis
randomisationstudy_num	Client identification number	Should have 375 unique IDs
blistpac1	Blister pack for PMC 1 collected	1=yes,2=No,.=missing
reason1	If no,reason for not collecting PMC1	text
actdhta1	Number of tablets collected from guardian for PMC 1
comment1	Comment for PMC1
pmc11	PMC 1 date	Date	Use this date for PMC 1 date for Kaplan meir
blistpac2	Blister pack for PMC 2 collected	1=yes,2=No,.=missing
reason2	If no,reason for not collecting PMC2
actdhta2	Number of tablets collected from guardian for PMC 2
comment2	Comment for PMC 2
pmc22	PMC 2 date		Use this date for PMC 2 date for Kaplan meir
blistpac3	Blister pack for PMC 3 collected	1=yes,2=No,.=missing
reason3	If no,reason for not collecting PMC3
actdhta3	Number of tablets collected from the guardian for PMC3
comment3	Comment for PMC3
pmc33	PMC 3 date		Use this date for PMC 3 date for Kaplan meir
PMC1Actual	Number of PMC1 doses administered to child		Use this for doses of PMC1
PMC2Actua2	Number of PMC2 doses administered to child		Use this for doses of PMC2
PMC3Actua3	Number of PMC3 doses administered to child		Use this for doses of PMC3
totaldoses	Total number of doses administered		Osu this for absolute doses
enrollmentdate	Date of enrollment		Use this to calcualte time-person years,
outcomedate	Outcome date		Use this fo Kaplan Meir and time-person years
outcome	Outcome	To code this 1=completed,2=death,3=withdrawal	Use this to count deaths,withdrawals,LTFs and completed for flowchart
